# Supplementary material for: The miR-582/CD1B Axis Is Involved in Regulation of Dendritic Cells and Is Associated with Clinical Outcomes in Advanced Lung Adenocarcinoma
Source: Biomed Res Int. 2020 Mar 17;2020:4360930. doi: 10.1155/2020/4360930 (PMC7103041; doi:10.1155/2020/4360930)
Supplement: Supplementary Materials — 1: the clinical information of 315 samples. Supplementary Materials 2: the fractions of different immune cells of 315 samples. Supplementary Materials 3: the details of miRNA/gene interaction network. Supplementary Figure S1: differences in cell fractions between the four stages. [file 4360930.f1.zip › Supplementary meterials1.xlsx]

## Sheet: TCGA samples
ID	Sample	OS_Event	OS_Time(month)	TNM	Status
1	TCGA-05-4249-01A	0	50.0712	stage ib	alive
2	TCGA-05-4250-01A	1	3.97808	stage iiia	dead
3	TCGA-05-4382-01A	0	19.9562	stage ib	alive
4	TCGA-05-4389-01A	0	45.0082	stage ia	alive
5	TCGA-05-4390-01A	0	37.0192	stage ib	alive
6	TCGA-05-4397-01A	1	24.0329	stage iib	dead
7	TCGA-05-4398-01A	0	47.0466	stage iiib	alive
8	TCGA-05-4402-01A	1	8.02192	stage iv	dead
9	TCGA-05-4403-01A	0	19.0027	stage ib	alive
10	TCGA-05-4405-01A	0	20.0548	stage ib	alive
11	TCGA-05-4417-01A	0	14.9589	stage ib	alive
12	TCGA-05-4418-01A	1	9.00822	stage iiia	dead
13	TCGA-05-4422-01A	0	12	stage ib	alive
14	TCGA-05-4424-01A	0	30.0164	stage iib	alive
15	TCGA-05-4425-01A	0	21.9945	stage iv	alive
16	TCGA-05-4426-01A	0	26.0055	stage ib	alive
17	TCGA-05-4430-01A	0	25.0192	stage ib	alive
18	TCGA-05-4432-01A	0	25.0192	stage iib	alive
19	TCGA-05-4433-01A	0	24	stage ib	alive
20	TCGA-05-4434-01A	1	15.0247	stage iv	dead
21	TCGA-05-5420-01A	0	15.0247	stage iiia	alive
22	TCGA-05-5423-01A	0	4.96438	stage iib	alive
23	TCGA-05-5425-01A	0	28.9973	stage iib	alive
24	TCGA-05-5428-01A	0	22.0274	stage iia	alive
25	TCGA-05-5715-01A	0	2.03836	stage ib	alive
26	TCGA-35-3615-01A	0	0.460274	stage ib	alive
27	TCGA-35-4122-01A	0	7.39726	stage ia	alive
28	TCGA-35-4123-01A	0	5.98356	stage ia	alive
29	TCGA-35-5375-01A	0	8.67945	stage iiia	alive
30	TCGA-38-4625-01A	0	97.7425	stage ib	alive
31	TCGA-38-4627-01A	1	37.7096	stage iia	dead
32	TCGA-38-4628-01A	1	49.0521	stage iib	dead
33	TCGA-38-4629-01A	1	28.4055	stage iib	dead
34	TCGA-38-4632-01A	1	44.6137	stage iv	dead
35	TCGA-38-7271-01A	1	26.3014	stage ia	dead
36	TCGA-38-A44F-01A	0	4.3726	stage ib	alive
37	TCGA-44-2655-01A	0	43.5288	stage ia	alive
38	TCGA-44-2656-01A	0	46.9808	stage ib	alive
39	TCGA-44-2657-01A	0	44.4164	stage ib	alive
40	TCGA-44-2659-01A	0	44.9425	stage iib	alive
41	TCGA-44-2661-01A	0	38.1041	stage ia	alive
42	TCGA-44-2662-01A	0	42.0822	stage ib	alive
43	TCGA-44-2665-01A	0	42.7726	stage iib	alive
44	TCGA-44-2668-01A	1	25.0192	stage ib	dead
45	TCGA-44-3396-01A	0	37.1507	stage iiia	alive
46	TCGA-44-3398-01A	0	38.2356	stage ia	alive
47	TCGA-44-3918-01A	0	34.0603	stage ia	alive
48	TCGA-44-3919-01A	1	33.7315	stage ia	dead
49	TCGA-44-5643-01A	0	33.3041	stage iiia	alive
50	TCGA-44-5645-01A	0	28.011	stage ia	alive
51	TCGA-44-6145-01A	0	19.5616	stage ia	alive
52	TCGA-44-6147-01A	0	27.7808	stage ia	alive
53	TCGA-44-6148-01A	0	23.1452	stage ia	alive
54	TCGA-44-6774-01A	0	21.6329	stage iiia	alive
55	TCGA-44-6775-01A	0	23.1781	stage ib	alive
56	TCGA-44-6777-01A	1	32.4493	stage ib	dead
57	TCGA-44-6778-01A	0	61.2822	stage ia	alive
58	TCGA-44-6779-01A	1	16.4384	stage iib	dead
59	TCGA-44-7661-01A	1	18.3123	stage ib	dead
60	TCGA-44-7662-01A	0	7.16712	stage ib	alive
61	TCGA-44-7667-01A	0	36.0658	stage iib	alive
62	TCGA-44-7669-01A	1	18.8712	stage iia	dead
63	TCGA-44-7672-01A	0	23.6384	stage ia	alive
64	TCGA-44-8117-01A	0	12.6575	stage ib	alive
65	TCGA-44-8119-01A	0	9.36986	stage iib	alive
66	TCGA-44-A479-01A	0	15.9781	stage ib	alive
67	TCGA-44-A47A-01A	0	15.3205	stage ib	alive
68	TCGA-44-A47B-01A	0	9.43562	stage ib	alive
69	TCGA-44-A47G-01A	0	11.5397	stage ia	alive
70	TCGA-44-A4SS-01A	0	13.6438	stage ia	alive
71	TCGA-49-4487-01A	1	28.1096	stage ia	dead
72	TCGA-49-4494-01A	1	35.5397	stage iiia	dead
73	TCGA-49-4505-01A	1	14.0712	stage iib	dead
74	TCGA-49-4506-01A	1	32.8438	stage iib	dead
75	TCGA-49-4507-01A	1	8.81096	stage iiia	dead
76	TCGA-49-4512-01A	1	29.7534	stage iiia	dead
77	TCGA-49-4514-01A	0	55.8904	stage ia	alive
78	TCGA-49-6743-01A	0	53.2932	stage iiia	alive
79	TCGA-49-6744-01A	0	55.3315	stage iia	alive
80	TCGA-49-6761-01A	0	11.6384	stage iiia	alive
81	TCGA-49-6767-01A	0	22.2575	stage iib	alive
82	TCGA-49-AAQV-01A	1	22.2575	stage ii	dead
83	TCGA-49-AAR0-01A	0	156.658	stage ia	alive
84	TCGA-49-AAR3-01A	0	62.2356	stage iib	alive
85	TCGA-49-AAR4-01A	1	28.8986	stage iiia	dead
86	TCGA-49-AAR9-01A	1	8.54795	stage iib	dead
87	TCGA-49-AARE-01A	1	40.4055	stage ia	dead
88	TCGA-49-AARO-01A	0	123.584	stage ia	alive
89	TCGA-49-AARQ-01A	0	221.326	stage i	alive
90	TCGA-49-AARR-01A	0	164.121	stage ia	alive
91	TCGA-4B-A93V-01A	1	9.86301	stage ia	dead
92	TCGA-50-5044-01A	1	20.5151	stage iiib	dead
93	TCGA-50-5049-01A	0	101.721	stage ia	alive
94	TCGA-50-5055-01A	1	60.1644	stage iia	dead
95	TCGA-50-5066-01A	0	47.4082	stage ib	alive
96	TCGA-50-5068-01A	1	49.2822	stage iib	dead
97	TCGA-50-5930-01A	1	9.27123	stage iiia	dead
98	TCGA-50-5933-01A	1	78.674	stage iiib	dead
99	TCGA-50-5935-01A	1	21.4685	stage ia	dead
100	TCGA-50-5936-01A	1	8.44932	stage iiia	dead
101	TCGA-50-5939-01A	1	15.1233	stage ib	dead
102	TCGA-50-5941-01A	0	48.4603	stage iiia	alive
103	TCGA-50-6590-01A	1	42.3452	stage ib	dead
104	TCGA-50-6592-01A	1	25.5452	stage ib	dead
105	TCGA-50-6593-01A	1	11.0466	stage iiia	dead
106	TCGA-50-6595-01A	1	6.2137	stage iiia	dead
107	TCGA-50-6597-01A	1	41.6877	stage ib	dead
108	TCGA-50-7109-01A	1	10.126	stage ia	dead
109	TCGA-50-8457-01A	0	36.9863	stage ia	alive
110	TCGA-50-8459-01A	0	36.789	stage iib	alive
111	TCGA-53-7624-01A	1	34.2904	stage iv	dead
112	TCGA-53-7626-01A	1	30.5425	stage iia	dead
113	TCGA-55-1592-01A	1	23.0466	stage ia	dead
114	TCGA-55-1595-01A	0	48.6247	stage ia	alive
115	TCGA-55-6642-01A	0	80.5151	stage ib	alive
116	TCGA-55-6712-01A	1	5.62192	stage iia	dead
117	TCGA-55-6968-01A	1	42.5096	stage iv	dead
118	TCGA-55-6969-01A	0	40.7342	stage ib	alive
119	TCGA-55-6970-01A	1	15.2548	stage iiia	dead
120	TCGA-55-6971-01A	0	46.0274	stage ib	alive
121	TCGA-55-6978-01A	1	5.7863	stage iia	dead
122	TCGA-55-6979-01A	1	7.79178	stage iib	dead
123	TCGA-55-6980-01A	0	69.337	stage ia	alive
124	TCGA-55-6982-01A	1	32.7123	stage iib	dead
125	TCGA-55-6983-01A	0	92.811	stage iib	alive
126	TCGA-55-6985-01A	0	40.537	stage ib	alive
127	TCGA-55-6986-01A	0	107.211	stage ib	alive
128	TCGA-55-6987-01A	0	70.2575	stage ia	alive
129	TCGA-55-7227-01A	1	31.2986	stage iiia	dead
130	TCGA-55-7281-01A	0	28.6685	stage ia	alive
131	TCGA-55-7574-01A	1	32.7123	stage ib	dead
132	TCGA-55-7576-01A	0	22.0274	stage ib	alive
133	TCGA-55-7724-01A	0	23.1781	stage ib	alive
134	TCGA-55-7725-01A	0	14.5315	stage ia	alive
135	TCGA-55-7727-01A	0	3.91233	stage iiia	alive
136	TCGA-55-7728-01A	0	23.1452	stage ib	alive
137	TCGA-55-7816-01A	1	15.3863	stage iv	dead
138	TCGA-55-7907-01A	1	11.2767	stage iia	dead
139	TCGA-55-7911-01A	0	17.6548	stage ia	alive
140	TCGA-55-7994-01A	0	19.8247	stage iib	alive
141	TCGA-55-7995-01A	0	29.2274	stage ia	alive
142	TCGA-55-8085-01A	0	29.7205	stage ia	alive
143	TCGA-55-8087-01A	0	15.189	stage ib	alive
144	TCGA-55-8089-01A	1	23.0795	stage ia	dead
145	TCGA-55-8091-01A	0	19.726	stage ib	alive
146	TCGA-55-8092-01A	1	5.06301	stage iib	dead
147	TCGA-55-8096-01A	1	23.6384	stage ib	dead
148	TCGA-55-8097-01A	0	15.6493	stage ia	alive
149	TCGA-55-8203-01A	0	17.9836	stage ia	alive
150	TCGA-55-8204-01A	0	16.9315	stage ib	alive
151	TCGA-55-8205-01A	0	19.6932	stage iia	alive
152	TCGA-55-8206-01A	0	29.1945	stage ia	alive
153	TCGA-55-8208-01A	0	22.1589	stage ia	alive
154	TCGA-55-8299-01A	1	15.4192	stage ia	dead
155	TCGA-55-8301-01A	0	17.5562	stage ib	alive
156	TCGA-55-8302-01A	0	15.7151	stage ib	alive
157	TCGA-55-8505-01A	0	14.4658	stage iiia	alive
158	TCGA-55-8506-01A	0	0.361644	stage iib	alive
159	TCGA-55-8507-01A	0	13.7425	stage ia	alive
160	TCGA-55-8508-01A	0	20.2849	stage iia	alive
161	TCGA-55-8510-01A	0	17.7205	stage ib	alive
162	TCGA-55-8511-01A	0	18.1479	stage ib	alive
163	TCGA-55-8513-01A	0	26.0055	stage iib	alive
164	TCGA-55-8619-01A	0	13.6767	stage iib	alive
165	TCGA-55-8620-01A	1	12.3288	stage iv	dead
166	TCGA-55-8621-01A	0	16.9315	stage ia	alive
167	TCGA-55-A48X-01A	0	22.6521	stage iia	alive
168	TCGA-55-A48Y-01A	0	20.7123	stage iia	alive
169	TCGA-55-A48Z-01A	0	21.4027	stage iiib	alive
170	TCGA-55-A490-01A	1	3.25479	stage iia	dead
171	TCGA-55-A491-01A	0	20.5808	stage ia	alive
172	TCGA-55-A493-01A	0	0.920548	stage ib	alive
173	TCGA-55-A4DF-01A	1	20.1863	stage ia	dead
174	TCGA-62-8394-01A	1	4.56986	stage iiib	dead
175	TCGA-62-8402-01A	1	49.2493	stage iiia	dead
176	TCGA-62-A46U-01A	0	67.9562	stage iib	alive
177	TCGA-62-A470-01A	1	39.2548	stage ib	dead
178	TCGA-64-1676-01A	0	56.811	stage ia	alive
179	TCGA-64-1677-01A	1	20.6466	stage iiia	dead
180	TCGA-64-1679-01A	0	81.7973	stage iiia	alive
181	TCGA-64-1681-01A	1	38.3671	stage ia	dead
182	TCGA-64-5778-01A	0	42.9041	stage ib	alive
183	TCGA-64-5781-01A	0	51.2548	stage ib	alive
184	TCGA-64-5815-01A	0	28.4712	stage iib	alive
185	TCGA-67-3770-01A	0	20.0548	stage ia	alive
186	TCGA-67-3771-01A	0	20.0548	stage ia	alive
187	TCGA-67-3772-01A	0	18.8384	stage ib	alive
188	TCGA-67-3774-01A	0	12.6575	stage ib	alive
189	TCGA-69-7761-01A	0	6.11507	stage ib	alive
190	TCGA-69-7974-01A	0	6.04932	stage iiia	alive
191	TCGA-69-7978-01A	0	4.40548	stage iib	alive
192	TCGA-69-7980-01A	0	11.9014	stage i	alive
193	TCGA-69-8255-01A	0	4.2411	stage ia	alive
194	TCGA-69-8453-01A	0	25.9068	stage iib	alive
195	TCGA-71-8520-01A	1	6.90411	stage ib	dead
196	TCGA-73-4658-01A	1	52.6027	stage ib	dead
197	TCGA-73-4659-01A	1	23.3753	stage iiia	dead
198	TCGA-73-4662-01A	0	82.6849	stage ia	alive
199	TCGA-73-4675-01A	1	30.3123	stage iiia	dead
200	TCGA-73-7499-01A	1	50.3342	stage ib	dead
201	TCGA-75-5125-01A	1	66.6411	stage iib	dead
202	TCGA-75-5146-01A	0	77.8521	stage ib	alive
203	TCGA-75-5147-01A	0	43.8247	stage ib	alive
204	TCGA-75-6206-01A	0	85.1507	stage ib	alive
205	TCGA-75-7025-01A	0	108.658	stage ib	alive
206	TCGA-78-7143-01A	1	163.101	stage ib	dead
207	TCGA-78-7147-01A	1	19.2658	stage iib	dead
208	TCGA-78-7152-01A	1	39.9452	stage ib	dead
209	TCGA-78-7160-01A	1	22.9151	stage iv	dead
210	TCGA-78-7162-01A	1	104.186	stage ia	dead
211	TCGA-78-7535-01A	1	31.2	stage ib	dead
212	TCGA-78-7536-01A	1	8.02192	stage iiia	dead
213	TCGA-78-7539-01A	0	26.0055	stage iia	alive
214	TCGA-78-7542-01A	1	10.5534	stage ib	dead
215	TCGA-78-8640-01A	0	232.175	stage iia	alive
216	TCGA-78-8648-01A	1	39.7479	stage iib	dead
217	TCGA-78-8655-01A	0	77.589	stage ia	alive
218	TCGA-78-8660-01A	1	10.5534	stage iib	dead
219	TCGA-80-5611-01A	0	85.3151	stage ib	alive
220	TCGA-83-5908-01A	0	27.0904	stage ia	alive
221	TCGA-86-6562-01A	1	12.3616	stage iia	dead
222	TCGA-86-6851-01A	0	5.88493	stage iia	alive
223	TCGA-86-7711-01A	1	34.389	stage iia	dead
224	TCGA-86-7714-01A	1	20.5479	stage iiia	dead
225	TCGA-86-7953-01A	0	32.7781	stage ia	alive
226	TCGA-86-7954-01A	0	19.8904	stage ib	alive
227	TCGA-86-8055-01A	1	4.07671	stage iia	dead
228	TCGA-86-8074-01A	0	0.789041	stage iia	alive
229	TCGA-86-8075-01A	1	22.8164	stage ib	dead
230	TCGA-86-8076-01A	0	32.6466	stage ia	alive
231	TCGA-86-8280-01A	0	23.0466	stage iia	alive
232	TCGA-86-8358-01A	0	21.4685	stage ib	alive
233	TCGA-86-8359-01A	1	14.5973	stage iiia	dead
234	TCGA-86-8585-01A	0	11.6055	stage ib	alive
235	TCGA-86-8668-01A	0	13.9068	stage ia	alive
236	TCGA-86-8671-01A	0	27.5836	stage iib	alive
237	TCGA-86-8672-01A	1	0.624658	stage iib	dead
238	TCGA-86-A4JF-01A	1	24.2301	stage iib	dead
239	TCGA-86-A4P7-01A	0	13.6438	stage ib	alive
240	TCGA-86-A4P8-01A	0	26.4658	stage iiia	alive
241	TCGA-91-6828-01A	0	10.6192	stage ia	alive
242	TCGA-91-6829-01A	1	41.3589	stage ib	dead
243	TCGA-91-6830-01A	0	1.9726	stage iia	alive
244	TCGA-91-6831-01A	0	10.1918	stage ib	alive
245	TCGA-91-6835-01A	0	2.59726	stage ia	alive
246	TCGA-91-6840-01A	0	12.2301	stage ia	alive
247	TCGA-91-6848-01A	0	7.36438	stage iiia	alive
248	TCGA-91-6849-01A	0	1.15068	stage iiia	alive
249	TCGA-91-7771-01A	0	16.1753	stage iib	alive
250	TCGA-91-8496-01A	0	16.6027	stage ib	alive
251	TCGA-91-8497-01A	1	14.2685	stage ia	dead
252	TCGA-91-8499-01A	0	1.18356	stage ia	alive
253	TCGA-91-A4BC-01A	0	1.44658	stage iia	alive
254	TCGA-91-A4BD-01A	0	19.8247	stage iia	alive
255	TCGA-93-7347-01A	0	22.4548	stage ia	alive
256	TCGA-93-7348-01A	0	17.4575	stage ia	alive
257	TCGA-93-A4JN-01A	0	23.6055	stage iv	alive
258	TCGA-93-A4JO-01A	1	1.08493	stage ia	dead
259	TCGA-93-A4JP-01A	0	19.0027	stage iv	alive
260	TCGA-93-A4JQ-01A	0	17.2932	stage ia	alive
261	TCGA-95-7562-01A	1	2.86027	stage iia	dead
262	TCGA-95-7567-01A	0	18.674	stage iib	alive
263	TCGA-95-7944-01A	0	12.3945	stage ia	alive
264	TCGA-95-7947-01A	0	15.6822	stage ia	alive
265	TCGA-95-8039-01A	0	27.2877	stage ia	alive
266	TCGA-95-A4VN-01A	0	18.1808	stage iia	alive
267	TCGA-95-A4VP-01A	0	19.8904	stage iiia	alive
268	TCGA-97-7552-01A	0	63.5178	stage ib	alive
269	TCGA-97-7553-01A	0	61.4795	stage ia	alive
270	TCGA-97-7554-01A	0	25.4795	stage iiia	alive
271	TCGA-97-7941-01A	0	15.9123	stage ia	alive
272	TCGA-97-8172-01A	0	17.9178	stage ib	alive
273	TCGA-97-8174-01A	1	5.39178	stage iia	dead
274	TCGA-97-8175-01A	0	18.1151	stage ib	alive
275	TCGA-97-8176-01A	1	15.3863	stage iiia	dead
276	TCGA-97-8177-01A	0	16.4055	stage ib	alive
277	TCGA-97-8547-01A	0	21.6	stage iiia	alive
278	TCGA-97-8552-01A	0	20.5808	stage i	alive
279	TCGA-97-A4LX-01A	0	20.1863	stage ib	alive
280	TCGA-97-A4M1-01A	0	19.7589	stage ia	alive
281	TCGA-97-A4M2-01A	0	20.5151	stage ia	alive
282	TCGA-97-A4M5-01A	0	20.8438	stage ia	alive
283	TCGA-97-A4M6-01A	0	18.674	stage ia	alive
284	TCGA-97-A4M7-01A	0	20.6795	stage ia	alive
285	TCGA-99-7458-01A	0	24.5589	stage iiia	alive
286	TCGA-99-8025-01A	0	34.8493	stage iiia	alive
287	TCGA-99-8028-01A	0	36.7562	stage ia	alive
288	TCGA-99-8033-01A	1	21.5671	stage iv	dead
289	TCGA-99-AA5R-01A	0	21.6329	stage ia	alive
290	TCGA-J2-8192-01A	0	24.2959	stage iia	alive
291	TCGA-L4-A4E6-01A	0	14.3014	stage ia	alive
292	TCGA-L9-A444-01A	0	10.0932	stage ia	alive
293	TCGA-L9-A743-01A	0	21.8301	stage iia	alive
294	TCGA-L9-A8F4-01A	0	15.6493	stage ib	alive
295	TCGA-MN-A4N4-01A	0	38.6301	stage ia	alive
296	TCGA-MP-A4SV-01A	1	86.137	stage ib	dead
297	TCGA-MP-A4SW-01A	1	58.4548	stage iib	dead
298	TCGA-MP-A4SY-01A	1	49.3479	stage iib	dead
299	TCGA-MP-A4T4-01A	1	86.0384	stage iib	dead
300	TCGA-MP-A4T7-01A	1	5.49041	stage iv	dead
301	TCGA-MP-A4T9-01A	1	41.589	stage iiia	dead
302	TCGA-MP-A4TC-01A	1	2.43288	stage iiia	dead
303	TCGA-MP-A4TD-01A	1	10.0932	stage iiia	dead
304	TCGA-MP-A4TH-01A	0	24.3616	stage ia	alive
305	TCGA-MP-A4TI-01A	1	14.1041	stage iia	dead
306	TCGA-MP-A4TJ-01A	1	11.1452	stage ia	dead
307	TCGA-MP-A4TK-01A	1	19.1342	stage iib	dead
308	TCGA-NJ-A4YF-01A	0	71.0466	stage ia	alive
309	TCGA-NJ-A4YG-01A	0	74.3342	stage ib	alive
310	TCGA-NJ-A4YP-01A	0	1.64384	stage ib	alive
311	TCGA-NJ-A4YQ-01A	0	47.0795	stage ia	alive
312	TCGA-NJ-A55A-01A	0	0.493151	stage ib	alive
313	TCGA-NJ-A55O-01A	0	0.427397	stage iia	alive
314	TCGA-NJ-A55R-01A	0	19.8247	stage ia	alive
315	TCGA-S2-AA1A-01A	0	16.8658	stage ia	alive
