# Supplementary material for: The miR-582/CD1B Axis Is Involved in Regulation of Dendritic Cells and Is Associated with Clinical Outcomes in Advanced Lung Adenocarcinoma
Source: Biomed Res Int. 2020 Mar 17;2020:4360930. doi: 10.1155/2020/4360930 (PMC7103041; doi:10.1155/2020/4360930)
Supplement: Supplementary Materials — 1: the clinical information of 315 samples. Supplementary Materials 2: the fractions of different immune cells of 315 samples. Supplementary Materials 3: the details of miRNA/gene interaction network. Supplementary Figure S1: differences in cell fractions between the four stages. [file 4360930.f1.zip › Supplementary meterials2.xlsx]

## Sheet: Cibersort result
Sample	B cells naive	B cells memory	Plasma cells	T cells CD8	T cells CD4 naive	T cells CD4 memory resting	T cells CD4 memory activated	T cells follicular helper	T cells regulatory (Tregs)	T cells gamma delta	NK cells resting	NK cells activated	Monocytes	Macrophages M0	Macrophages M1	Macrophages M2	Dendritic cells resting	Dendritic cells activated	Mast cells resting	Mast cells activated	Eosinophils	Neutrophils	P-value	Pearson Correlation	RMSE
TCGA-05-4249-01A	0	0.0795928	0	0.0109461	0	0.100261	0	0.0635164	0.0322913	0	0.0008	0.00720607	0.0398615	0	0.0369576	0.228988	0.230573	0.0210227	0.127476	0	0	0.0205125	0.007	0.280627	0.966575
TCGA-05-4250-01A	0.0146656	0	0	0.104765	0	0.160588	0.0528475	0.0843281	0.0157212	0	0.0283325	0.0128614	0.00678446	0.0109396	0.0661421	0.344115	0	0.0562791	0.0314657	0	0	0.0101644	0.032	0.194053	1.00975
TCGA-05-4382-01A	0.0165164	0	0	0.0522088	0	0.139886	0.0001	0.0375562	0.0303963	0	0.0204285	0	0.00889783	0.195505	0.0552288	0.430461	0	0	0	0.00526186	0	0.00752866	0.002	0.3559	0.947804
TCGA-05-4389-01A	0.0144841	0.00147046	0	0.096796	0	0.0962441	0.00280363	0.0854041	0.0484417	0	0.0161305	0.0308138	0	0.0829145	0.0763098	0.249234	0.0590138	0.0235593	0.11638	0	0	0	0.008	0.26729	0.974539
TCGA-05-4390-01A	0.0135678	0	0	0	0	0.198081	0	0.0475617	0.0398271	0	0.0724709	0	0	0.426603	0.0110992	0.163548	0	0	0	0.0179222	0	0.00931641	0.037	0.182238	1.05169
TCGA-05-4397-01A	0.0155103	0	0	0.00336082	0	0.0585097	0.019755	0.0272479	0.0296844	0	0.0514623	0	0.00316869	0.320748	0.18361	0.170226	0	0.0599327	0.0565042	0	0	0.0003	0.007	0.277397	1.00323
TCGA-05-4398-01A	0.0009	0.0221607	0	0.0622428	0	0.172509	0.0349248	0.073315	0.0108247	0	0.0409661	0	0.0434204	0.0852116	0.0906264	0.286808	0.0392162	0.00861535	0.0212786	0	0	0.00698373	0.017	0.227403	0.994533
TCGA-05-4402-01A	0.0503364	0	0	0.0260496	0	0.0819291	0	0.0623908	0.0459583	0	0.0151144	0.00235497	0.0481124	0.0913343	0.0408926	0.341823	0	0.100797	0.0635013	0	0	0.0294062	0.013	0.230983	0.994103
TCGA-05-4403-01A	0.0401548	0	0	0.0198168	0	0.146163	0	0.00993317	0.0298573	0	0.0292435	0	0.0398432	0.215414	0.0695612	0.327035	0.00563213	0	0.0606698	0	0	0.00667603	0.01	0.253574	0.99302
TCGA-05-4405-01A	0.00190849	0.0636374	0	0.0308104	0	0.0943635	0	0.0471853	0.0356524	0	0.0237426	0	0	0.333179	0.0114483	0.291825	0	0	0.0662473	0	0	0	0.007	0.284368	0.98726
TCGA-05-4417-01A	0.030123	0.0134633	0	0	0	0.248491	0.00532356	0.0965972	0.0387867	0	0.0385878	0.00536158	0	0.156265	0.0388002	0.222079	0.0194183	0.0648956	0.0130787	0	0	0.00872943	0.003	0.338165	0.945856
TCGA-05-4418-01A	0.0313663	0.0316653	0	0.109111	0	0.121364	0	0.137397	0.0193165	0	0	0.0156356	0	0.127844	0.11194	0.273992	0	0.0120182	0	0	0	0.00835	0.011	0.239631	0.995699
TCGA-05-4422-01A	0	0.0620221	0.0629989	0.188447	0	0.210594	0	0.071044	0.0376077	0	0.0230484	0.00727577	0.0341696	0.0246031	0.0569681	0.215228	0	0.0012449	0.00474849	0	0	0	0.041	0.176258	1.01912
TCGA-05-4424-01A	0.0398813	0	0	0.0434935	0	0.203957	0	0.0344086	0.0002	0	0.0291533	0	0.0141271	0.102135	0.0532402	0.369686	0	0.029822	0.0686372	0	0	0.0112377	0.011	0.239215	0.991988
TCGA-05-4425-01A	0	0.00845774	0	0	0	0.241969	0	0.015709	0.00688838	0	0.0208487	0	0	0.252361	0.0632323	0.320158	0.0297677	0	0.0406091	0	0	0	0.001	0.496698	0.867543
TCGA-05-4426-01A	0.056707	0	0	0.0115153	0	0.227862	0	0	0.0549722	0	0.0286729	0.00126834	0.0571728	0.288088	0.0201221	0.210696	0	0	0.0275803	0	0	0.0153433	0.029	0.199832	1.01888
TCGA-05-4430-01A	0.0188432	0	0	0.0239873	0	0.113543	0.0124412	0.0374338	0.0357961	0	0.0134783	0	0	0.167564	0.032074	0.371692	0.044908	0.0481547	0.0582602	0	0	0.0218239	0.002	0.40063	0.918712
TCGA-05-4432-01A	0.027339	0.00621247	0	0.0692711	0	0.135314	0.00367786	0.0911584	0.0453506	0	0.0534131	0	0	0.289877	0.0760728	0.167019	0	0	0.0057878	0	0	0.0295067	0.008	0.266115	0.987807
TCGA-05-4433-01A	0.0475464	0	0	0.0725895	0	0.108075	0	0.0440731	0.0230161	0	0.0445306	0	0.00215038	0.287842	0.076717	0.208679	0.0183855	0	0.0581883	0	0	0.00820686	0.012	0.232865	1.00273
TCGA-05-4434-01A	0.0477413	0.00560392	0	0.0508269	0	0.100603	0.0306102	0.0388206	0.0368066	0	0.0565019	0	0.0133822	0.147875	0.123105	0.265854	0	0.0392447	0.0359937	0	0	0.0070306	0.002	0.397829	0.91867
TCGA-05-5420-01A	0.028124	0	0.00274594	0.0122562	0	0.137377	0.00483299	0.0869651	0.0172186	0	0.0178066	0.0003	0.00211971	0.171375	0.174978	0.280256	0.0254349	0	0.0261593	0	0	0.0120339	0	0.570801	0.822923
TCGA-05-5423-01A	0.0102206	0.0330749	0	0	0	0.152442	0	0.0442645	0.0296118	0	0.013941	0	0.0300099	0.0640602	0.0128697	0.289933	0.155922	0.0707262	0.0662843	0	0	0.0266405	0.01	0.245209	0.985027
TCGA-05-5425-01A	0.0546868	0	0.00139201	0.0872047	0	0.125712	0.016738	0.0626056	0.0293192	0	0.0333165	0.00200004	0.0131531	0.0781322	0.0890096	0.227626	0	0.115672	0.0397553	0	0	0.0236768	0.002	0.360748	0.934977
TCGA-05-5428-01A	0.0261158	0	0.00148658	0.0390676	0	0.0710972	0	0.0328151	0	0	0	0.00195689	0	0.0707664	0.0334196	0.450698	0.0767541	0	0.134559	0.0304974	0	0.0307665	0.014	0.229014	1.0059
TCGA-05-5715-01A	0.00362266	0.0112688	0	0	0	0.0874003	0	0.0139129	0.0513589	0	0.0382477	0	0	0.451542	0.00599946	0.273148	0	0.0005	0.0626193	0	0	0.0004	0.002	0.371543	0.956664
TCGA-35-3615-01A	0.063879	0	0	0.0487949	0	0.0944948	0	0.07594	0.01878	0	0.00926728	0.00739426	0.00269137	0.102543	0.0309658	0.390279	0.00674354	0.0858269	0.0580659	0	0	0.00433425	0.013	0.230882	0.996774
TCGA-35-4122-01A	0.00844865	0	0	0.0986392	0	0.117419	0.00162763	0.0965167	0	0	0.0004	0.0166861	0.0214458	0.042531	0.0881477	0.416026	0.00901756	0.0347151	0.0326977	0	0	0.0156656	0.002	0.414806	0.910458
TCGA-35-4123-01A	0.0223965	0	0.00675198	0.182221	0	0.10644	0.0358789	0.101048	0.0403687	0	0.00300218	0.0200058	0.0247331	0.14194	0.0320587	0.242209	0.00697585	0.0104757	0.0133968	0.0100986	0	0	0.002	0.467289	0.88368
TCGA-35-5375-01A	0.0129579	0.0214909	0	0.0884921	0	0.199017	0	0.0849921	0.0702017	0	0	0.0141921	0	0.0625073	0.148041	0.246435	0.0140953	0	0.0308405	0	0	0.00673796	0.007	0.286421	0.974043
TCGA-38-4625-01A	0.00620027	0	0.00998365	0	0	0.18497	0	0.0544978	0.00444378	0	0	0.027131	0	0.189344	0.0954822	0.338484	0	0.0181113	0.0683424	0	0	0.0030093	0.003	0.32262	0.959408
TCGA-38-4627-01A	0.0312212	0	0	0.0117501	0	0.200104	0	0.0107114	0	0	0.0256658	0	0.0717415	0.0185867	0.019454	0.494737	0.00634247	0.0535841	0.048232	0	0	0.00786921	0.002	0.344379	0.946826
TCGA-38-4628-01A	0	0.00223674	0	0	0	0.178102	0	0.0738026	0.0459888	0	0	0.0194739	0.0474325	0.144956	0	0.38881	0.00901423	0.00991252	0.0701236	0	0	0.0101462	0.02	0.224076	1.00499
TCGA-38-4629-01A	0.0106933	0.00133097	0	0.0704737	0	0.0757694	0.00731149	0.0629602	0.0119689	0	0	0.00609904	0.0215145	0.144539	0.0968346	0.455949	0.00149909	0	0.025111	0	0	0.00444755	0.002	0.406696	0.919064
TCGA-38-4632-01A	0.0200377	0	0	0.0561672	0	0.13266	0.0531487	0.0557165	0.0241417	0	0.0404018	0	0.0402816	0.0133777	0.0324372	0.2804	0.111896	0.0635537	0.0578262	0	0	0.0179547	0.01	0.257244	0.97585
TCGA-38-7271-01A	0.0282175	0.225956	0	0.0687349	0	0.211611	0.00248174	0.0594815	0.0324958	0	0.0553675	0	0.00846975	0.113334	0.0541802	0.123428	0	0	0.0117953	0.00444782	0	0	0.002	0.374498	0.928347
TCGA-38-A44F-01A	0	0.153734	0	0.0529112	0	0.156524	0	0.0883366	0.0331174	0	0.0295209	0	0.0200302	0.0458077	0.0877138	0.20833	0.0425583	0.00477928	0.0764757	0	0	0.0002	0.003	0.334059	0.943933
TCGA-44-2655-01A	0.048714	0.10433	0	0	0	0.183151	0	0.112485	0.0144818	0	0.00518508	0.020387	0.0198559	0.0461098	0.0259964	0.255192	0.0651928	0.0255135	0.0666159	0	0	0.00678985	0.032	0.194748	1.00032
TCGA-44-2656-01A	0.00863311	0.0164909	0	0.152492	0	0.144222	0.0212282	0.0516398	0.026294	0	0.0359218	0	0.0229761	0.0886772	0.107903	0.234677	0.0158394	0.0148822	0.0567866	0	0	0.00133621	0.007	0.281438	0.971613
TCGA-44-2657-01A	0.0723613	0.107953	0	0.16092	0	0.134512	0	0.12167	0.0486285	0	0.010939	0	0.00771885	0.029644	0.0656075	0.18519	0	0.00422874	0.0506256	0	0	0	0.002	0.351419	0.938946
TCGA-44-2659-01A	0.0356231	0	0	0.139745	0	0.27486	0	0.0704385	0.0857136	0	0.00116933	0	0.0135417	0.0333628	0.0525075	0.232934	0	0.0192116	0.0391811	0	0	0.00171208	0.041	0.176137	1.02282
TCGA-44-2661-01A	0.0182433	0.0165794	0	0.04454	0	0.127244	0.00540229	0.0744228	0.00937799	0	0	0.0114462	0.0105614	0	0.0524237	0.380715	0.0877956	0.0216466	0.139601	0	0	0	0.002	0.388948	0.921269
TCGA-44-2662-01A	0.00252843	0	0	0	0	0.128084	0.0222546	0.0221139	0.00841546	0	0.0334204	0	0.127241	0.19566	0.0400039	0.328114	0	0	0.042393	0	0	0.0497725	0.025	0.204236	1.02031
TCGA-44-2665-01A	0	0.00251898	0	0	0	0.212203	0	0	0.0004	0	0.0377957	0	0.00422695	0.208946	0	0.344383	0.0328791	0.0918251	0.061186	0	0	0.00359701	0.035	0.18745	1.02792
TCGA-44-2668-01A	0.00172291	0	0	0.0613545	0	0.0890849	0.0632206	0.00481788	0.0248666	0	0	0.0354881	0.0254872	0.430977	0.0757619	0.11077	0	0.0199935	0	0.0457909	0	0.010664	0.002	0.471688	0.885596
TCGA-44-3396-01A	0.0420394	0	0	0	0	0.202271	0	0.0703872	0.0079001	0	0.0384237	0	0	0.251792	0.0594812	0.234839	0	0.0236176	0	0.0340732	0	0.0351758	0.002	0.431952	0.902422
TCGA-44-3398-01A	0.00980779	0	0.00192588	0	0	0.206251	0	0.0193067	0	0	0.023917	0.0673802	0.00934577	0	0	0.201291	0.272708	0.0831783	0.0923703	0	0	0.0125182	0.032	0.191871	1.00848
TCGA-44-3918-01A	0.0697788	0	0.00643995	0.056268	0	0.175252	0.0124007	0.0999003	0.0149418	0	0.00435418	0.0260752	0	0.104858	0.0886519	0.277827	0	0	0.0615584	0	0	0	0.003	0.33431	0.946555
TCGA-44-3919-01A	0.0158734	0.0340843	0	0	0	0.153943	0	0.0844034	0.0214309	0	0.00575129	0.0204872	0	0.106937	0.122001	0.241385	0.0352964	0.00221958	0.153692	0	0	0.00249538	0.002	0.389248	0.921332
TCGA-44-5643-01A	0.100241	0	0	0.0806015	0	0.0982928	0.0403733	0.0859942	0.0676999	0	0.0736766	0	0.0191563	0.11745	0.0744015	0.184306	0.0227905	0.0206307	0.0143858	0	0	0	0.014	0.22819	0.991494
TCGA-44-5645-01A	0	0.136003	0	0.0359825	0	0.204237	0.00380353	0.0568276	0.0529115	0	0.0153289	0.00151153	0.0358686	0.0613034	0.0111677	0.190183	0.0688983	0.0685234	0.0574506	0	0	0	0.003	0.304128	0.955898
TCGA-44-6145-01A	0.0381536	0.0394429	0.0348632	0.154231	0	0.128378	0.0379063	0.05332	0.0408213	0	0.0195447	0.0140636	0	0.0267785	0.0675198	0.21568	0	0.0526762	0.0430432	0	0	0.0335781	0.003	0.30738	0.956261
TCGA-44-6147-01A	0.0205933	0.186873	0	0.0345291	0	0.145542	0	0.0589224	0.0441636	0	0.00162025	0	0	0.219615	0.0729934	0.120701	0	0.00795485	0.0864917	0	0	0	0.016	0.227606	0.993116
TCGA-44-6148-01A	0.0920568	0	0.00964839	0.0316636	0	0.168918	0	0.0865413	0	0	0.00295475	0.0138189	0.0677629	0.0259453	0.00876457	0.26816	0	0.0202279	0.19776	0	0	0.00577767	0.049	0.168307	1.01252
TCGA-44-6774-01A	0.044193	0	0	0	0	0.191499	0	0.026345	0.0446375	0	0.0642778	0	0.0421907	0.216784	0.038719	0.29526	0	0.00834532	0.00270865	0.00282387	0	0.022215	0.01	0.245096	0.995536
TCGA-44-6775-01A	0.00429267	0	0.001	0.039797	0	0.0809886	0	0.0480993	0.0802805	0	0	0.0127909	0.0159851	0.252027	0	0.322007	0.0305003	0.0515749	0.0572994	0	0	0.00337154	0.002	0.395825	0.923566
TCGA-44-6777-01A	0.0215318	0.011449	0	0.0138844	0	0.12858	0.00179021	0.0280169	0.0235376	0	0.0197943	0	0.0445274	0.133824	0.033107	0.376307	0.0731351	0.0145619	0.0656073	0	0	0.0103465	0.002	0.386039	0.925339
TCGA-44-6778-01A	0.0297881	0.0462764	0	0.0390332	0	0.218502	0.0230941	0.0725525	0	0	0.00954394	0	0	0.177141	0.0759873	0.287815	0	0	0.0117673	0	0	0.00849883	0.002	0.346582	0.943948
TCGA-44-6779-01A	0.0007	0	0	0.154768	0	0.166584	0	0.028135	0.0387575	0	0.0751897	0.0102213	0.00638239	0.0588554	0.143904	0.245011	0	0	0.0669005	0	0	0.00458176	0.01	0.254142	0.991272
TCGA-44-7661-01A	0.0186255	0	0	0	0	0.141321	0.0436305	0.0488271	0.0376062	0	0.012572	0.024588	0.06538	0.0515324	0.0302514	0.299224	0	0.16072	0.0645928	0	0	0.00112914	0.002	0.364918	0.932358
TCGA-44-7662-01A	0.0443798	0	0.00202547	0.0446722	0	0.107461	0.00674435	0.0334418	0.0505587	0	0.0578293	0	0	0.261499	0.0751642	0.273865	0	0	0.0361899	0	0	0.00616918	0.006	0.297606	0.972201
TCGA-44-7667-01A	0.0395628	0	0.0021327	0.0211898	0	0.084432	0.026717	0.0383563	0.00547533	0	0	0.0445676	0.00440666	0.453081	0.0707013	0.188834	0	0	0.0205436	0	0	0	0.003	0.31822	0.983152
TCGA-44-7669-01A	0.0380992	0	0	0.039257	0	0.151404	0	0.0783466	0	0	0.0478648	0	0	0.0987153	0.0706058	0.381909	0	0.0189384	0.0746751	0	0	0.0002	0.007	0.284396	0.971929
TCGA-44-7672-01A	0.0207217	0.0698419	0	0.0658672	0	0.18453	0.00612823	0.0611345	0.0707698	0	0.0396255	0.0001	0.0372254	0.108895	0.065595	0.181622	0.0075846	0.0529139	0.0272265	0	0	0.0002	0.002	0.343087	0.941485
TCGA-44-8117-01A	0.0288215	0	0	0.0209876	0	0.130505	0.0052258	0.0782957	0.0189862	0	0.0457858	0	0	0.260742	0.0749255	0.304139	0	0	0.0311518	0	0	0.0004	0.029	0.198681	1.02363
TCGA-44-8119-01A	0.0466054	0	0.00865417	0.0001	0	0.163717	0.0138781	0.0525846	0.0532984	0	0.0553096	0.00606862	0.0175557	0.32862	0.0683358	0.184914	0	0	0.0003	0	0	0	0.013	0.231461	1.00789
TCGA-44-A479-01A	0.0343626	0.0328368	0.00835001	0.065565	0	0.210762	0.0145257	0.0933963	0.0420634	0	0.0132549	0.00495185	0	0.0715172	0.128281	0.2322	0	0	0.047934	0	0	0	0.002	0.38189	0.92535
TCGA-44-A47A-01A	0	0.0215051	0	0.0389704	0	0.0908863	0	0.0607159	0.048641	0	0.00209393	0.0164012	0.0198841	0.198644	0	0.145807	0.132304	0.154444	0.0697025	0	0	0	0.002	0.383887	0.924967
TCGA-44-A47B-01A	0	0.00515124	0	0.102643	0	0.121196	0.00342159	0.044075	0.0565338	0	0	0.0348774	0	0.245335	0.0598976	0.22947	0.00763268	0	0.0897668	0	0	0	0.02	0.224012	1.00374
TCGA-44-A47G-01A	0.00515781	0.114554	0	0.107658	0	0.14102	0.0271998	0.0674748	0.0120968	0	0.00900439	0	0.0234074	0.0997725	0.0891216	0.250478	0.00621672	0.00607215	0.0407668	0	0	0	0.007	0.28028	0.969328
TCGA-44-A4SS-01A	0.021243	0	0	0.051167	0	0.211809	0.01488	0.0908091	0.0502199	0	0.0754374	0	0.00633537	0.0552925	0.130877	0.245849	0	0.00211435	0.0417429	0	0	0.00222269	0.003	0.307045	0.962175
TCGA-49-4487-01A	0.0901135	0.0814248	0	0.114889	0	0.0626175	0.0300323	0.0829038	0.0693987	0	0.047173	0	0	0.227932	0.0793103	0.104244	0	0	0	0.00996099	0	0	0.002	0.460386	0.887009
TCGA-49-4494-01A	0.014776	0	0.00297051	0	0	0.0934344	0	0.114108	0.0549422	0	0.0319639	0	0	0.2124	0.101031	0.277013	0	0.0336368	0.0366317	0	0	0	0.003	0.327901	0.955792
TCGA-49-4505-01A	0.00452735	0.0212213	0	0.0567433	0	0.163713	0.0003	0.0619325	0.0442991	0	0.0115854	0.0155704	0.0345372	0	0.069855	0.288288	0.0445776	0.0825855	0.090108	0	0	0.0101927	0.01	0.243757	0.983876
TCGA-49-4506-01A	0.0343217	0	0	0.327398	0	0.00941147	0.0597546	0.0794279	0.00923666	0	0.0327246	0.0008	0	0.0972991	0.118486	0.202171	0.0189868	0	0.001	0	0	0.00896551	0.02	0.223676	1.00691
TCGA-49-4507-01A	0.024465	0	0.010306	0.258491	0	0.100968	0.0341626	0.0777475	0.0677946	0	0.0858849	0.0389645	0.00900238	0.0568104	0.0593411	0.146257	0	0	0.0298046	0	0	0	0.003	0.311325	0.967146
TCGA-49-4512-01A	0.0343665	0.0137656	0	0.00315745	0	0.106496	0	0.0484187	0.0309332	0	0	0.0149264	0.0546777	0.209778	0.0242181	0.313672	0.0404557	0.035655	0.0694794	0	0	0	0.021	0.220705	1.0064
TCGA-49-4514-01A	0.0608182	0	0	0.101486	0	0.0804003	0.00405968	0.143143	0.118849	0	0.0001	0.0822405	0.0259239	0.109771	0.0222406	0.127947	0	0.082262	0.040772	0	0	0	0.037	0.182257	1.01537
TCGA-49-6743-01A	0.0678531	0	0	0.0163345	0	0.173962	0.0009	0.0903602	0.0004	0	0.0737044	0	0	0.200592	0.0659702	0.229755	0	0.0347377	0.045346	0	0	0	0.011	0.235037	0.993639
TCGA-49-6744-01A	0.0133316	0.0118197	0	0.0772052	0	0.168491	0	0.0745491	0.0321458	0	0	0.0151663	0.00826496	0.100488	0.0401254	0.227044	0.0382653	0.076863	0.107557	0	0	0.00868414	0.007	0.279907	0.968473
TCGA-49-6761-01A	0	0.0694844	0	0	0	0.222692	0.0682746	0.131041	0.0104165	0	0.0287501	0.0493812	0	0.11572	0.0487781	0.178084	0	0.0626868	0.0089012	0	0	0.00578939	0.014	0.228701	0.993359
TCGA-49-6767-01A	0.0046063	0.0016225	0	0.0324349	0	0.136053	0	0.0389441	0.0548818	0	0	0.087177	0	0.361348	0.0902499	0.141248	0	0.00409848	0.0473359	0	0	0	0.002	0.372008	0.939822
TCGA-49-AAQV-01A	0.0876586	0.0436155	0	0.0589009	0	0.108846	0	0.167014	0.0511152	0	0.0128391	0.0128151	0	0.268767	0.0638666	0.0903297	0	0.0124015	0.0218309	0	0	0	0.025	0.205247	1.00982
TCGA-49-AAR0-01A	0.0528406	0.0347192	0	0.0993369	0	0.0758337	0	0.150651	0.0678382	0	0	0.0134478	0.00953335	0.109145	0.0782354	0.271329	0	0	0.0370894	0	0	0	0.007	0.288368	0.967707
TCGA-49-AAR3-01A	0.00200455	0.0139803	0	0.165774	0	0	0.0414306	0.100085	0.0535206	0	0.00840477	0.0247988	0	0.278886	0.0874219	0.198454	0	0	0.0252395	0	0	0	0.002	0.478029	0.877613
TCGA-49-AAR4-01A	0.0295176	0	0	0.339401	0	0.09603	0.0290067	0.118759	0.0358875	0	0.0263321	0	0.0003	0.164791	0.054889	0.0975978	0	0	0.00748877	0	0	0	0.002	0.367669	0.939401
TCGA-49-AAR9-01A	0	0.00211818	0	0.101929	0	0	0	0.102574	0.0334367	0	0	0.0691596	0	0.427822	0.0475285	0.0687244	0	0.102111	0.0445965	0	0	0	0.011	0.237553	1.01898
TCGA-49-AARE-01A	0.0706525	0	0	0.0265841	0	0	0	0.16274	0.0737204	0	0.0716077	0	0.00293277	0.361981	0.0834189	0.102695	0	0	0.0436673	0	0	0	0.009	0.261374	0.99204
TCGA-49-AARO-01A	0.0236245	0.0662547	0	0.0415767	0	0.0909322	0	0.0792079	0.0337212	0	0.0241104	0.0168441	0.0186171	0.273568	0.00855148	0.205454	0.0208513	0.0745085	0.0221777	0	0	0	0.002	0.373764	0.931548
TCGA-49-AARQ-01A	0.0116032	0	0.00367917	0.0813893	0	0.0969676	0	0.211543	0.0002	0	0	0.084962	0.0311478	0.177551	0.128599	0.0667136	0.00288759	0	0.102804	0	0	0	0.024	0.209396	1.00953
TCGA-49-AARR-01A	0.093919	0.0572852	0	0.097324	0	0.0756629	0	0.108551	0.0169043	0	0.0549125	0	0.00994383	0.107311	0.0261241	0.222592	0	0.00462906	0.116619	0	0	0.00822195	0.021	0.220818	0.991356
TCGA-4B-A93V-01A	0	0.0205026	0.0168896	0.072863	0	0.155747	0.00907342	0.0852241	0.00676204	0	0.0509584	0.00806843	0	0.41917	0.0377966	0.110155	0	0	0.00678911	0	0	0	0.014	0.229593	1.01963
TCGA-50-5044-01A	0.0004	0	0	0.126753	0	0.0400718	0.0180237	0.0870752	0.0676968	0	0	0.0637129	0.011684	0.0863553	0.0332789	0.274617	0.0127522	0.102929	0.0746936	0	0	0	0.007	0.272468	0.974688
TCGA-50-5049-01A	0.0231949	0.0267855	0	0.159989	0	0.112002	0.00621532	0.0668674	0.0419818	0	0.0122282	0	0.0346796	0.221946	0.0944638	0.158124	0.00943147	0	0.0320906	0	0	0	0.002	0.468819	0.882584
TCGA-50-5055-01A	0.164243	0.0798145	0	0.127735	0	0.0762241	0	0.0571654	0.102807	0	0.00181164	0	0.0302503	0.19606	0.0599983	0.0907698	0.00773279	0	0	0.00538794	0	0	0.002	0.430516	0.901905
TCGA-50-5066-01A	0.0005	0.0316723	0.017207	0.172696	0	0.0905304	0.0638471	0.0803311	0.00421286	0	0.00369921	0	0.00638883	0.119669	0.0804494	0.295591	0.00212378	0	0.0311203	0	0	0	0.002	0.387124	0.922729
TCGA-50-5068-01A	0.0244741	0.0306065	0	0.104547	0	0.182668	0	0.0852987	0.00101166	0	0	0	0.0118797	0.0673556	0.148517	0.183597	0.1115	0	0.0424319	0	0	0	0.002	0.364539	0.933918
TCGA-50-5930-01A	0.0445742	0.0313714	0.0201501	0.132547	0	0.133265	0	0.0775352	0.0167218	0	0.0369533	0	0.00503355	0.240997	0.0419707	0.205202	0	0	0.0136796	0	0	0	0.025	0.207841	1.00948
TCGA-50-5933-01A	0.00211005	0.0064125	0	0.0165575	0	0.135913	0	0.0240935	0.0251853	0	0.0179373	0	0.0199226	0.262028	0.0483245	0.383476	0	0.00216859	0.0421715	0	0	0.0137003	0.003	0.331658	0.963643
TCGA-50-5935-01A	0.00215687	0.0110305	0	0	0	0.215861	0	0.0178838	0.100674	0	0	0	0	0.183584	0.053476	0.213919	0.0219629	0.0595384	0.0471893	0	0	0	0.025	0.20466	1.00771
TCGA-50-5936-01A	0.00839118	0.0102793	0	0	0	0.140143	0	0.0887016	0.0407551	0	0.0223322	0	0	0.388085	0	0.161089	0	0.131643	0	0.00858163	0	0	0.002	0.40894	0.921662
TCGA-50-5939-01A	0	0.0973946	0.0254845	0.0157711	0	0.158317	0.00285706	0.0676724	0.0388019	0	0.012323	0.0142895	0.00401435	0.221462	0.0505688	0.226332	0	0	0.0485542	0	0	0.0161577	0.024	0.21296	1.00204
TCGA-50-5941-01A	0.0509268	0	0	0.108857	0	0.118111	0	0.10556	0.0340118	0	0.0532239	0	0.0117388	0.0777219	0.120407	0.22279	0	0.053726	0.0340708	0	0	0.00885473	0.003	0.323205	0.953906
TCGA-50-6590-01A	0	0.0411302	0	0.0901994	0	0.110922	0	0.0328154	0.0793225	0	0.0251213	0.0246918	0.00251537	0.232225	0.129945	0.201751	0	0	0.0293622	0	0	0	0.002	0.415177	0.911474
TCGA-50-6592-01A	0.0692824	0	0.00344503	0.0583571	0	0.165844	0.0271292	0.0409194	0.0156943	0	0.0966194	0	0	0.237892	0.102397	0.162606	0	0	0.0130995	0	0	0.00671468	0.002	0.346965	0.944723
TCGA-50-6593-01A	0.0112126	0.015818	0	0.012838	0	0.0723001	0	0.0311654	0.0267923	0	0	0.0189824	0.0365035	0.326452	0.0132081	0.234825	0.0706017	0.0270248	0.0838263	0	0	0.0184496	0.003	0.320649	0.967347
TCGA-50-6595-01A	0.00182927	0	0	0.0421563	0	0.104242	0	0.0453283	0.0271058	0	0.0716496	0	0	0.170557	0.221319	0.279593	0	0.0297211	0.0064981	0	0	0	0.001	0.48986	0.874343
TCGA-50-6597-01A	0	0.0477833	0.0672168	0.0765914	0	0.296033	0	0.0178708	0.127391	0	0	0.0278606	0.0102163	0.012589	0.0685734	0.148549	0.0302544	0.0330598	0.0360105	0	0	0	0.01	0.24635	0.986185
TCGA-50-7109-01A	0.0438995	0	0.021485	0.0736822	0	0.219629	0	0.131208	0.0515747	0	0.0332696	0.0188209	0.0151441	0.0484838	0.0658707	0.185453	0	0.0650999	0.0221709	0	0	0.00420916	0.044	0.171754	1.01941
TCGA-50-8457-01A	0	0.164043	0	0.104383	0	0.172474	0	0.070075	0.0340287	0	0	0.00606785	0.07619	0.0129818	0.0524784	0.195913	0.00955216	0.00651344	0.0953003	0	0	0	0.014	0.229641	0.986841
TCGA-50-8459-01A	0.0373558	0.0222162	0	0.0518332	0	0.0654451	0	0.0370901	0.0446514	0	0.0414633	0	0.095479	0.143035	0.0260909	0.309359	0.0714735	0.00613961	0.0428049	0	0	0.00556351	0.002	0.359959	0.936147
TCGA-53-7624-01A	0.0980313	0	0.00761915	0.0501215	0	0.0251522	0.0006	0.12035	0.0267997	0	0.0180707	0.0110649	0	0.270333	0.196956	0.128666	0	0.0244288	0.0218408	0	0	0	0.01	0.248004	1.00825
TCGA-53-7626-01A	0.0196823	0.0731615	0	0.0974299	0	0.223774	0	0.0480547	0.0349994	0	0.0309094	0	0.0356387	0.0818989	0.0609714	0.227814	0.0131256	0	0.0366972	0.00675902	0	0.00908432	0.044	0.17239	1.01502
TCGA-55-1592-01A	0.0435178	0	0	0.0193272	0	0.111137	0	0.0473612	0.0163045	0	0.0294631	0	0.0564739	0.24065	0.0523949	0.310895	0.00283273	0	0.0576587	0	0	0.011983	0.007	0.28444	0.97886
TCGA-55-1595-01A	0.0525091	0	0	0.0490124	0	0.209274	0	0.100359	0.0527273	0	0.00996253	0.0212316	0.00245297	0.0520894	0.0471361	0.314304	0.00261498	0.0517464	0.0345797	0	0	0	0.02	0.224477	0.995816
TCGA-55-6642-01A	0	0.0331693	0.154616	0.0692614	0	0.182826	0.0394526	0.00975527	0.0317432	0	0.058103	0	0	0.167473	0.0271476	0.147068	0	0.0260945	0.0505207	0	0	0.00276887	0.014	0.229256	0.987713
TCGA-55-6712-01A	0.0309552	0	0	0.165135	0	0.0913806	0	0.033081	0.028387	0	0.0185453	0	0	0.229328	0.116372	0.2254	0	0	0.0614157	0	0	0	0.002	0.380404	0.92932
TCGA-55-6968-01A	0.0155794	0	0	0.0004	0	0.0928965	0.00166893	0.0662883	0.0604835	0	0.0140247	0.0102606	0	0.413296	0.123902	0.156757	0.00200695	0	0.0424213	0	0	0	0.001	0.482782	0.878475
TCGA-55-6969-01A	0.0109343	0.0238112	0	0.0313829	0	0.125821	0	0.0973756	0.0728863	0	0.0421492	0	0	0.339824	0.0631084	0.167278	0	0	0.0254291	0	0	0	0.002	0.465457	0.885102
TCGA-55-6970-01A	0.0473756	0	0	0.040431	0	0.193024	0.0046454	0.0701608	0	0	0.0181931	0	0.014426	0.0575468	0.0423961	0.31773	0	0.130982	0.0630898	0	0	0	0.009	0.264142	0.978221
TCGA-55-6971-01A	0	0.0830636	0.0151505	0.0728751	0	0.210613	0	0.0594551	0.0551438	0	0.0223975	0.0232811	0.01479	0.143516	0.0696683	0.151012	0	0.0141921	0.0552312	0	0	0.0096113	0.003	0.338054	0.944008
TCGA-55-6978-01A	0.00493285	0	0.00432935	0.114196	0	0.180566	0.00248374	0.0745521	0.0217221	0	0.0141297	0.0386369	0.00137005	0.055198	0.151706	0.266856	0	0.00771494	0.0616055	0	0	0	0.002	0.434757	0.900565
TCGA-55-6979-01A	0.00857303	0.0155324	0	0.0396548	0	0.136129	0	0.0813782	0.0443063	0	0.0094506	0.0119149	0	0.139074	0.174421	0.298318	0	0	0.0412475	0	0	0	0	0.541715	0.840906
TCGA-55-6980-01A	0.0261126	0	0	0	0	0.260336	0	0.083038	0.0676411	0	0.00702595	0.0135334	0.0827403	0	0.0256104	0.168527	0.117345	0.111019	0.034382	0	0	0.00268942	0.036	0.184383	1.00742
TCGA-55-6982-01A	0.0103705	0.0185482	0	0	0	0.0909413	0	0.0397858	0.0566617	0	0	0	0	0.239684	0.0859146	0.357223	0.0184661	0.0164853	0.0615947	0	0	0.00432465	0.007	0.287096	0.98408
TCGA-55-6983-01A	0.0840683	0.172322	0	0.051839	0	0.102936	0	0.119881	0.0440664	0	0.0458244	0	0.0045494	0.133147	0.0112995	0.180761	0	0.0209543	0.0283518	0	0	0	0.003	0.30747	0.957723
TCGA-55-6985-01A	0.0292843	0.0191006	0	0	0	0.21883	0	0.103369	0.0176178	0	0.00705991	0.0391478	0	0.208524	0.0817198	0.20287	0	0.0234116	0.0490652	0	0	0	0.039	0.178732	1.02051
TCGA-55-6986-01A	0.0397527	0.0358164	0	0.0525552	0	0.174468	0	0.0575941	0.0251771	0	0.0321436	0	0.0142517	0.0147839	0.0445149	0.39845	0.0669946	0.00409723	0.0355077	0	0	0.00389273	0.027	0.202066	1.00535
TCGA-55-6987-01A	0	0.0949887	0	0.170565	0	0.135379	0.00349061	0.083654	0.0448724	0	0.0413779	0.0309129	0.0227438	0.11577	0.076862	0.121718	0	0	0.0532916	0	0	0.00437431	0.002	0.37753	0.927301
TCGA-55-7227-01A	0.0114908	0	0	0.00841977	0	0.0854839	0.0002	0.0925963	0.0661888	0	0.0200935	0.0180614	0.00880737	0.132744	0.101453	0.271017	0.106908	0.0035696	0.0672962	0	0	0.00566898	0.003	0.324988	0.952505
TCGA-55-7281-01A	0	0.0058066	0	0.0344085	0	0.137371	0	0.0564344	0.0432846	0	0	0.0274933	0.0689288	0.0720081	0.0439293	0.288462	0.11212	0.0612059	0.0485476	0	0	0	0.011	0.237543	0.989002
TCGA-55-7574-01A	0.0606651	0.199882	0	0.10557	0	0.160969	0.0214706	0.0691196	0.00263803	0	0.0291857	0	0	0.0891916	0.0364979	0.163072	0	0.0316589	0.0300784	0	0	0	0.003	0.319702	0.952034
TCGA-55-7576-01A	0.0143452	0.0231781	0	0.0469016	0	0.151069	0.0213962	0.0526685	0.0488729	0	0.0178853	0	0.0320131	0.11174	0.0478954	0.30867	0.0406773	0.0248662	0.0545086	0	0	0.00331171	0.024	0.208838	1.00107
TCGA-55-7724-01A	0.0443878	0.0121267	0	0.00228841	0	0.101075	0.0146701	0.0403011	0	0	0	0	0	0.113213	0.0492962	0.365254	0.0242413	0.069891	0.0609744	0	0	0.0584211	0.002	0.380661	0.927142
TCGA-55-7725-01A	0.0816504	0.0119944	0	0.0268821	0	0.215594	0.00337849	0.0902132	0	0	0.0200833	0	0.00255495	0.0691423	0.0866929	0.236569	0	0.0403385	0.105947	0	0	0.00895988	0.029	0.199589	1.00211
TCGA-55-7727-01A	0.0891954	0.077439	0	0	0	0.183265	0.0214743	0.0812805	0	0	0.00747793	0	0	0.030977	0.056647	0.333929	0.00969952	0.0309089	0.0592341	0	0	0.0002	0.049	0.169454	1.01426
TCGA-55-7728-01A	0	0.0653979	0	0.0345146	0	0.0995979	0	0.0107469	0.029607	0	0.0102724	0.0117604	0	0.539747	0.0194525	0.136842	0.00828242	0	0.0337789	0	0	0	0	0.700683	0.718507
TCGA-55-7816-01A	0.0104895	0	0.00114749	0.111026	0	0.0182141	0	0.00952521	0.0359256	0	0.0139305	0.00602547	0.153843	0	0.0753582	0.528237	0	0	0.0346603	0	0	0.00161779	0.003	0.320793	0.964962
TCGA-55-7907-01A	0.0731073	0	0.00238099	0.0705818	0	0.107713	0	0.123099	0.0409201	0	0	0.0206105	0	0.0899174	0.164397	0.251233	0	0	0.0560389	0	0	0	0.007	0.288567	0.97277
TCGA-55-7911-01A	0.0213708	0.00327645	0	0.0307584	0	0.186222	0.0522068	0.116176	0.0361571	0	0.0902463	0	0.00853523	0	0.0290047	0.207055	0	0.201665	0.0173258	0	0	0	0.009	0.263796	0.981423
TCGA-55-7994-01A	0.0249771	0	0	0.070559	0	0.0879723	0.00587866	0.0669344	0.0070135	0	0.0270688	0.0435972	0	0.21831	0.0905813	0.251867	0.00725645	0.00958009	0.0868204	0	0	0.00158357	0.003	0.316971	0.959473
TCGA-55-7995-01A	0.0217037	0.0273903	0	0.096736	0	0.117827	0	0.0536738	0.0656259	0	0.0387837	0.0207613	0	0.31055	0.113133	0.0885282	0	0	0.0452867	0	0	0	0.001	0.498199	0.86631
TCGA-55-8085-01A	0.0349893	0	0	0.0570541	0	0.0744162	0	0.166079	0.00600664	0	0.0156186	0.0529652	0	0.205033	0.0863782	0.205425	0	0.051759	0.034243	0	0	0.0100332	0.011	0.241198	0.994448
TCGA-55-8087-01A	0	0.0377965	0	0.0290895	0	0.12952	0	0.00906318	0.0212234	0	0	0.0400245	0.0280613	0.0853482	0.00915765	0.191219	0.278649	0	0.132407	0	0	0.0084396	0.033	0.190439	1.01011
TCGA-55-8089-01A	0.0224943	0	0	0.121145	0	0.121806	0.0251171	0.0352239	0.0336143	0	0.0333164	0.0506313	0.0166753	0.0964147	0.158509	0.207916	0	0.00738903	0.069747	0	0	0	0.001	0.49098	0.870562
TCGA-55-8091-01A	0.00923277	0	0	0.00538612	0	0.200849	0	0.0071493	0.0518921	0	0.034574	0.0187445	0.0140367	0.0777355	0.068893	0.268166	0.0583841	0.0692834	0.100912	0	0	0.0147616	0.011	0.236312	0.988697
TCGA-55-8092-01A	0	0.06087	0.125636	0.182907	0	0.135149	0.0103503	0.0958241	0.0515572	0	0.015356	0.0336584	0.0327043	0.0500348	0.0893234	0.106189	0	0	0.0104406	0	0	0	0.01	0.251441	0.985166
TCGA-55-8096-01A	0.0652777	0	0.0754346	0.0236322	0	0.0849117	0	0.0176792	0.0315997	0	0.0344529	0	0.0136856	0.336952	0.0344293	0.245388	0	0	0.0365569	0	0	0	0.007	0.26883	0.990713
TCGA-55-8097-01A	0.0396102	0.0458296	0	0.0435582	0	0.157564	0	0.122646	0.0146719	0	0.00407185	0.00116815	0.00856068	0	0.0279569	0.275533	0.0837135	0.03163	0.143486	0	0	0	0.037	0.182039	1.00535
TCGA-55-8203-01A	0	0.153129	0	0.0497244	0	0.185897	0.0191229	0.11146	0.0448968	0	0.054065	0	0.0003	0.117606	0.0777279	0.159429	0.0008	0.00688442	0.0149258	0	0	0.0040264	0.036	0.184451	1.01153
TCGA-55-8204-01A	0.0315222	0	0.0982909	0.054114	0	0.165028	0	0.0469685	0	0	0.0351101	0	0.0139913	0	0.138166	0.203962	0.0424021	0.0364646	0.086071	0	0	0.04791	0.029	0.198817	1.00284
TCGA-55-8205-01A	0.0157901	0.0089663	0	0.0756341	0	0.136788	0.0349939	0.060668	0.00292621	0	0.0259877	0.00331354	0.044834	0.0766	0.12095	0.367146	0.00354439	0	0.0209176	0	0	0.0009	0.002	0.398913	0.918506
TCGA-55-8206-01A	0	0.0317693	0	0.0100311	0	0.0839789	0	0.046595	0.0230283	0	0	0.0312005	0.311671	0.00283957	0	0.151823	0.109598	0.0286847	0.16878	0	0	0	0.021	0.222539	0.996784
TCGA-55-8208-01A	0.0278686	0.0468709	0	0	0	0.0915911	0.00518145	0.107002	0.0146717	0	0.0167961	0.00266384	0	0.201327	0.136603	0.320208	0	0	0.027081	0	0	0.00213535	0	0.544987	0.838988
TCGA-55-8299-01A	0.0224352	0.0155744	0	0.10947	0	0.0235379	0.00649339	0.0828118	0.0378784	0	0.116254	0.0113434	0.0179442	0	0.0197303	0.161052	0	0.307452	0.0630841	0	0	0.00493933	0.002	0.470847	0.881666
TCGA-55-8301-01A	0.00402568	0.0327939	0	0.0547094	0	0.165883	0	0.0383988	0.0724167	0	0.0444343	0	0	0.263365	0.201249	0.0747155	0.00365955	0.00260137	0.0417471	0	0	0	0.001	0.505914	0.861991
TCGA-55-8302-01A	0.00989017	0.00470878	0	0.113851	0	0.0239651	0	0.173181	0.0216406	0	0.0157399	0.0282828	0.0217264	0.128313	0.0783306	0.264457	0	0.0190009	0.0969124	0	0	0	0.049	0.16971	1.01967
TCGA-55-8505-01A	0.044122	0	0	0	0	0.20653	0	0.0239894	0.069057	0	0.0474209	0	0	0.442465	0.0112993	0.0975259	0	0	0	0.0575905	0	0	0.032	0.193548	1.04339
TCGA-55-8506-01A	0	0.00489691	0	0.0570239	0	0.100785	0.0116852	0.0581354	0.0233949	0	0.0637281	0	0.0197254	0.373507	0.0593336	0.163964	0	0	0.0638211	0	0	0	0.007	0.281073	0.987053
TCGA-55-8507-01A	0	0.0122102	0	0.0404242	0	0.0986263	0	0.0527202	0.0379688	0	0.0548263	0.0133201	0.0162345	0.37293	0.0175754	0.161197	0	0.0398314	0.0509331	0	0	0.0312024	0.027	0.201872	1.02793
TCGA-55-8508-01A	0.0176365	0.0420097	0.129931	0.0376816	0	0.136524	0	0.0467784	0.0506867	0	0.0527321	0	0	0.370234	0.0166596	0.0583383	0	0.0115639	0	0.00731006	0	0.0219135	0.011	0.239656	0.999746
TCGA-55-8510-01A	0.0502398	0	0	0.134754	0	0.0963373	0	0.103344	0.0333271	0	0.0224748	0.00627483	0.0239974	0.0887328	0.0640656	0.262897	0.0293129	0.0156366	0.0648108	0	0	0.00379496	0.003	0.311199	0.955678
TCGA-55-8511-01A	0.027904	0.0829724	0	0.0982657	0	0.175108	0.032805	0.108882	0.0153774	0	0.072448	0	0.0194393	0.0693778	0.0945686	0.202852	0	0	0	0	0	0	0.012	0.234359	0.992874
TCGA-55-8513-01A	0.0009	0.118133	0	0.00333967	0	0.0388095	0	0.0808524	0	0	0.0263964	0	0	0.194666	0.0223085	0.41726	0.0186686	0.0339497	0.03884	0	0	0.00589175	0.002	0.344304	0.951156
TCGA-55-8619-01A	0.0429895	0.0972927	0	0.110678	0	0.0627906	0	0.0787525	0.0366516	0	0.0458557	0	0.01764	0.153502	0.0434709	0.243022	0	0	0.0462088	0	0	0.0211453	0.007	0.284645	0.967624
TCGA-55-8620-01A	0.0341093	0.0166124	0	0.110226	0	0.0978202	0	0.0878651	0.0766881	0	0.0317978	0	0	0.222135	0.102828	0.171671	0	0	0.0482465	0	0	0	0.007	0.277351	0.976646
TCGA-55-8621-01A	0	0.00524812	0	0.0459761	0	0.168016	0	0.032956	0.0246047	0	0.0621636	0.00823768	0.0372591	0.184355	0.080949	0.254245	0.013892	0	0.0734565	0	0	0.00864036	0.004	0.300644	0.964817
TCGA-55-A48X-01A	0.0717305	0.264012	0	0.0422985	0	0.154569	0	0.10664	0.0350026	0	0.0398465	0	0	0.0724844	0.0338412	0.147124	0	0	0.0324514	0	0	0	0.008	0.265922	0.978035
TCGA-55-A48Y-01A	0.0458683	0	0.0829913	0.037351	0	0.133227	0	0.0551854	0.0492577	0	0.0170666	0.007232	0	0.350274	0.0447572	0.124018	0	0.0150803	0.0250022	0	0	0.0126888	0.014	0.228996	1.0045
TCGA-55-A48Z-01A	0.0232202	0	0	0.0364131	0	0.100373	0	0.0529118	0.0920525	0	0.0268159	0.00241685	0	0.389743	0.0873377	0.167724	0	0	0.0209917	0	0	0	0.006	0.292768	0.985716
TCGA-55-A490-01A	0.0235923	0	0	0.0716302	0	0.155484	0.011199	0.0244897	0.097816	0	0.0389939	0	0.0547143	0.307199	0.0142822	0.159955	0.0277265	0.00741097	0	0.00550697	0	0	0.024	0.211121	1.01464
TCGA-55-A491-01A	0.0846031	0	0	0.0841782	0	0.165219	0	0.0553608	0.0591651	0	0.0242021	0	0.0181045	0.223458	0.0910117	0.174668	0	0	0.0200291	0	0	0	0.018	0.225592	1.00042
TCGA-55-A493-01A	0.100708	0	0	0.0653907	0	0.164572	0.028184	0.0433374	0.0937368	0	0.0418365	0.0153724	0	0.163075	0.0479545	0.207734	0.00208311	0.0260164	0	0	0	0	0.003	0.319727	0.95432
TCGA-55-A4DF-01A	0.0578822	0	0	0.0511906	0	0.182302	0.0173015	0.134268	0.011785	0	0.0186433	0	0	0.256988	0.100647	0.148114	0	0	0.0208796	0	0	0	0.002	0.341597	0.947942
TCGA-62-8394-01A	0.00797118	0	0.00156546	0	0	0.0538977	0	0.132173	0.0707557	0	0.0437917	0	0.0469715	0.328404	0	0.175639	0	0.135938	0	0.00289185	0	0	0.032	0.191881	1.03026
TCGA-62-8402-01A	0.0486852	0	0	0	0	0.217261	0.00723502	0.012243	0.0468559	0	0	0.0303838	0	0.283168	0.168869	0.131185	0	0	0.0415464	0	0	0	0.002	0.420993	0.910874
TCGA-62-A46U-01A	0.00330347	0	0	0	0	0.100765	0	0.0649678	0.052357	0	0.0136208	0.00306652	0	0.479132	0.108866	0.137369	0	0	0.0326604	0	0	0.00389146	0	0.571588	0.820352
TCGA-62-A470-01A	0.00153835	0	0.00208439	0.0437158	0	0.163654	0	0.0222974	0.0525905	0	0.0481632	0.00917159	0.0519258	0.02836	0	0.483713	0	0.0290063	0.059148	0	0	0.00463107	0.038	0.180118	1.02386
TCGA-64-1676-01A	0.0233942	0	0.00251401	0.112052	0	0.091899	0	0.055774	0.0157231	0	0	0.0216816	0.114175	0.0736022	0.0516174	0.368543	0.0536596	0	0.0153645	0	0	0	0.025	0.206709	1.00848
TCGA-64-1677-01A	0.0679148	0.004436	0	0	0	0.229166	0.00797919	0.206086	0.0126129	0	0.0305719	0.0210018	0	0.146099	0.169753	0.0776379	0	0.0161223	0.00962935	0	0	0.001	0.011	0.238592	1.00351
TCGA-64-1679-01A	0.0059791	0.00610386	0	0.00521493	0	0.0505635	0	0.012959	0.0300508	0	0	0.00594733	0	0.447418	0.0522969	0.230184	0.0466347	0.0156447	0.0669201	0	0	0.0240836	0.003	0.311008	0.995128
TCGA-64-1681-01A	0	0.0822797	0	0.0121758	0	0.153446	0	0.0350764	0.0292564	0	0.00637203	0	0.0201896	0.0842139	0.139367	0.208268	0.123157	0.0350669	0.0711309	0	0	0	0.01	0.256099	0.983148
TCGA-64-5778-01A	0.0190932	0.0665001	0	0.250431	0	0.138561	0.00806421	0.076543	0.0439916	0	0	0.00883116	0	0.0830114	0.140775	0.147455	0	0.0006	0.0161412	0	0	0	0.004	0.29874	0.971855
TCGA-64-5781-01A	0.073143	0	0.00581861	0.28662	0	0.0887323	0.0221368	0.151017	0.00852306	0	0	0.130708	0.0197184	0.0631809	0.0382668	0.065306	0	0.0064419	0.0391881	0	0	0	0.011	0.241093	1.01123
TCGA-64-5815-01A	0	0.0217204	0	0	0	0.125843	0	0.0166919	0.0428219	0	0.0217372	0	0	0.42501	0	0.202166	0	0.108637	0.0339288	0	0	0.00144359	0	0.580647	0.814088
TCGA-67-3770-01A	0.0119435	0	0.00670161	0	0	0.249482	0.00207037	0.0402713	0	0	0	0.0117907	0.0157488	0	0.0267669	0.342062	0.0218267	0.0734607	0.153287	0	0	0.011612	0.01	0.245562	0.983756
TCGA-67-3771-01A	0.0756266	0	0	0.0630699	0	0.0946632	0.0214108	0.0349083	0.0563518	0	0.0288769	0	0.0101937	0.238842	0.110664	0.235417	0	0	0.0288536	0	0	0.00112169	0.002	0.383591	0.927077
TCGA-67-3772-01A	0.0450601	0	0	0.0324939	0	0.20271	0	0.0552626	0	0	0	0.0105294	0.057595	0.00513815	0.0233639	0.326813	0.083559	0.0906478	0.0662711	0	0	0.0006	0.035	0.188936	1.00702
TCGA-67-3774-01A	0	0.0446817	0	0.0543638	0	0.262743	0	0.103587	0.0006	0	0.0157335	0.0214419	0.0291754	0.00899251	0.0710189	0.264495	0	0.0500892	0.0598887	0	0	0.0132119	0.04	0.177008	1.01449
TCGA-69-7761-01A	0	0.0392391	0.0387403	0.0672776	0	0.189161	0.0362368	0.0601596	0.0138271	0	0.0486739	0	0	0.112094	0.183432	0.12564	0.0009	0.00985132	0.0595472	0	0	0.0151834	0.003	0.335724	0.950256
TCGA-69-7974-01A	0.00728148	0.0114399	0	0.0232773	0	0.140466	0	0.0729066	0.0133412	0	0.0496277	0	0.0113808	0.0547307	0.0577433	0.457559	0.0340843	0.0285687	0.0350632	0	0	0.00253044	0.003	0.306064	0.964842
TCGA-69-7978-01A	0.00723153	0.0145836	0	0.110889	0	0.187464	0.00202894	0.0531441	0.0373097	0	0.0132699	0.0340113	0.00728633	0.0657	0.0969273	0.256057	0.0710683	0.00177857	0.0400497	0	0	0.00120072	0.003	0.315668	0.956042
TCGA-69-7980-01A	0.0069991	0.00559573	0	0.0593808	0	0.17356	0	0.109036	0.0183014	0	0	0.0309859	0.0188068	0.0644871	0.0873816	0.307264	0	0.012562	0.104952	0	0	0	0.021	0.221777	0.996753
TCGA-69-8255-01A	0.060664	0	0	0.245474	0	0.0180934	0.0427237	0.147319	0.0553688	0	0.0822355	0.0146518	0.0158133	0.0492369	0.0839885	0.153818	0	0	0.0306135	0	0	0	0.012	0.234365	0.999499
TCGA-69-8453-01A	0.0083014	0.0178185	0	0.0660818	0	0.0172294	0	0.0998738	0.0575673	0	0.00425918	0.014685	0	0.381217	0.0746955	0.186917	0.0142991	0	0.0468697	0	0	0.0101848	0.002	0.356493	0.949645
TCGA-71-8520-01A	0.0129369	0	0	0	0	0.105814	0	0.0907812	0.0302127	0	0.0104672	0.0227887	0	0.348185	0.0120188	0.247514	0	0.0544811	0.0605375	0	0	0.00426344	0.029	0.199213	1.03163
TCGA-73-4658-01A	0.00490054	0	0	0.0401057	0	0.167733	0.00733391	0.0676974	0.00747303	0	0.0239017	0	0.0230809	0	0.0170109	0.416256	0.123696	0.0553911	0.0454208	0	0	0	0.004	0.302416	0.963296
TCGA-73-4659-01A	0.0157632	0	0	0.0013362	0	0.122514	0	0.00582764	0	0	0.0371642	0	0.0115681	0.10803	0.00751889	0.587198	0	0.0191048	0.0581603	0	0	0.0258146	0.004	0.300095	0.984835
TCGA-73-4662-01A	0.00865188	0.114079	0	0.0550196	0	0.191041	0	0.0874912	0.0343306	0	0.00654971	0	0.0766537	0.0721846	0.0331133	0.20204	0.0282995	0.0534744	0.0370704	0	0	0	0.025	0.205883	0.996882
TCGA-73-4675-01A	0.00999324	0.0147319	0	0.0303348	0	0.0564933	0	0.0512396	0.069146	0	0.0219265	0.00520288	0	0.364368	0	0.234041	0	0.0755724	0.066951	0	0	0	0.024	0.210611	1.02731
TCGA-73-7499-01A	0.0109338	0.012288	0	0.242808	0	0.099918	0.0344262	0.0682587	0.0717999	0	0.0126836	0	0.00678433	0.0578208	0.133268	0.21909	0.0031714	0.00836275	0.018386	0	0	0	0.002	0.432577	0.901824
TCGA-75-5125-01A	0.0125205	0	0.00237159	0.0212157	0	0.162018	0.0089546	0.05635	0.0089762	0	0.0150417	0.0290987	0.00574453	0.00958981	0.170766	0.340662	0.0008	0.0478706	0.108027	0	0	0	0.002	0.429094	0.904195
TCGA-75-5146-01A	0.0498453	0.082298	0.0254624	0.0424658	0	0.280975	0	0.0823634	0.00459807	0	0.0459327	0	0.0175481	0	0.0421228	0.270427	0.016619	0.0183341	0.0174469	0	0	0.00356163	0.025	0.204928	1.0012
TCGA-75-5147-01A	0.0585722	0	0.0316823	0.0192779	0	0.181081	0	0.0686426	0.0298315	0	0.0216712	0	0.0326375	0.0974688	0.0893104	0.28289	0.00511987	0.00713024	0.0610868	0	0	0.0135985	0.006	0.292801	0.963592
TCGA-75-6206-01A	0.013934	0	0.00445061	0	0	0.0955003	0	0.0602106	0.0362751	0	0.0148812	0.0193725	0	0.367007	0.00349556	0.30715	0	0.0273726	0.0503502	0	0	0	0.01	0.244786	1.01803
TCGA-75-7025-01A	0	0.182721	0	0.0667155	0	0.138353	0	0.09426	0.00202825	0	0.00714092	0.0104781	0.0689577	0	0.00996537	0.175419	0.079388	0.0800648	0.0830838	0	0	0.00142443	0.036	0.185155	1.00069
TCGA-78-7143-01A	0	0.0677955	0	0.0103795	0	0.182376	0	0.0802303	0.0247937	0	0.0157812	0.00783002	0.0480391	0.0864753	0.0187087	0.222545	0.0733654	0.0925664	0.069114	0	0	0	0.012	0.233299	0.985758
TCGA-78-7147-01A	0.0825757	0	0.00469523	0.0928942	0	0.205277	0	0.0422265	0.0688218	0	0.0147677	0.0109738	0.0353736	0.0388424	0.157282	0.140688	0.00438971	0.0243033	0.0768895	0	0	0	0.037	0.181567	1.02015
TCGA-78-7152-01A	0.0150583	0.114138	0	0.0682798	0	0.131016	0.001	0.125374	0.0125683	0	0.0386969	0	0.00604068	0.133038	0.0925638	0.168769	0.001	0	0.0869664	0	0	0.00556193	0.021	0.219989	0.993755
TCGA-78-7160-01A	0.0589517	0	0	0.0776495	0	0.123297	0.0154484	0.0679581	0.0297948	0	0.00204481	0	0.00956728	0.111839	0.0608302	0.344529	0	0.0625169	0.0321054	0	0	0.00346799	0.003	0.308582	0.960452
TCGA-78-7162-01A	0.0386162	0.0386038	0	0.123199	0	0.137528	0	0.0973016	0.0211133	0	0.0436269	0.00928666	0.00227954	0.0375383	0.0838279	0.226634	0.00653615	0.0507982	0.08311	0	0	0	0.012	0.233408	0.989668
TCGA-78-7535-01A	0.0013629	0	0.0009	0	0	0.105738	0	0.0179564	0.045318	0	0.112649	0	0.00674788	0.216019	0.00261453	0.411016	0.00772248	0	0	0.0684188	0	0.00354782	0.011	0.239648	1.01255
TCGA-78-7536-01A	0.0026432	0	0.00581179	0.117045	0	0.036086	0.0008	0.0490091	0.0041608	0	0.0351029	0.0004	0.0399422	0.0514531	0.144014	0.378124	0.0256314	0	0.109396	0	0	0	0.032	0.192775	1.01992
TCGA-78-7539-01A	0.0206197	0	0	0.133115	0	0.198786	0.019901	0.0664129	0.0382539	0	0.01522	0	0.0216562	0.117728	0.116257	0.148735	0.0526074	0	0.0507073	0	0	0	0.036	0.184159	1.01526
TCGA-78-7542-01A	0.00280828	0	0	0.0584674	0	0.0390372	0	0.10956	0.0601352	0	0.057266	0.0025702	0.00365416	0.0888821	0.190131	0.15687	0	0.175225	0.0553935	0	0	0	0.012	0.233207	1.02154
TCGA-78-8640-01A	0.0557844	0	0	0.060894	0	0.109327	0	0.135337	0.0189484	0	0.0406133	0.029141	0.0120718	0.277865	0.0715695	0.161676	0	0	0.0267719	0	0	0	0.024	0.213406	1.00958
TCGA-78-8648-01A	0.0164894	0.00897982	0	0.0790102	0	0	0.00436899	0.0519575	0.0588364	0	0.0222654	0	0	0.459576	0.0211932	0.234996	0	0	0.0423277	0	0	0	0	0.63387	0.774516
TCGA-78-8655-01A	0.0275442	0.0011617	0	0.0684019	0	0.0543686	0	0.0396196	0.0811033	0	0.0331373	0	0	0.287946	0.0536524	0.295335	0	0	0.0577299	0	0	0	0.003	0.314285	0.966878
TCGA-78-8660-01A	0.0154381	0.0236019	0	0.0608111	0	0.132919	0	0.132249	0.0572495	0	0.0559578	0.016892	0	0.218719	0.070671	0.208015	0	0.006338	0	0.00113814	0	0	0.002	0.394705	0.920953
TCGA-80-5611-01A	0.00452837	0	0.00137167	0	0	0.0445522	0	0.036736	0.0550986	0	0.0307369	0	0.0726601	0.451322	0.120432	0.136364	0.00532879	0	0.0408699	0	0	0	0.001	0.48448	0.88011
TCGA-83-5908-01A	0.0195751	0	0	0.142284	0	0.161363	0.0239402	0.126938	0.00505046	0	0.0660679	0.032056	0.00719471	0.0319204	0.176005	0.148874	0.011075	0	0.0476555	0	0	0	0.002	0.402195	0.920308
TCGA-86-6562-01A	0.0573159	0	0	0	0	0.173424	0	0.0156349	0.0561035	0	0.063686	0	0.00131279	0.185214	0.0216306	0.363486	0	0.0163599	0.0102713	0.0145551	0	0.0210053	0.032	0.193454	1.02061
TCGA-86-6851-01A	0.00880371	0.0302367	0	0.106584	0	0.155145	0.00677186	0.0793772	0.0550019	0	0.0585498	0.0186801	0.00536878	0.142406	0.100689	0.159966	0.00207888	0	0.0703414	0	0	0	0.002	0.347136	0.941812
TCGA-86-7711-01A	0	0.00103634	0	0.034934	0	0.13049	0	0.0121109	0.00163633	0	0.034298	0	0	0.38232	0.0531137	0.147293	0	0.0223433	0	0.123736	0	0.0566884	0.041	0.17683	1.0568
TCGA-86-7714-01A	0.0096714	0	0	0.0102641	0	0.154643	0	0.0003	0.00409768	0	0.00731173	0.0147569	0.0278254	0	0.00523857	0.239589	0.267756	0.132034	0.11659	0	0	0.00996772	0.024	0.213496	1.00293
TCGA-86-7953-01A	0	0.0321791	0	0.0425796	0	0.235764	0.0138113	0.071411	0.0382562	0	0.0492864	0	0.067215	0.103414	0.0177401	0.255795	0	0.0490376	0	0.0122589	0	0.0112519	0.032	0.193719	1.00875
TCGA-86-7954-01A	0.0580888	0	0	0.0709196	0	0.0956253	0	0.094488	0.0451213	0	0.0275293	0.0009	0.0431837	0.00524616	0.19412	0.234043	0	0.0548005	0.0741468	0	0	0.00176562	0.002	0.357653	0.94209
TCGA-86-8055-01A	0.037756	0	0	0	0	0.176497	0	0.0431436	0.0336581	0	0.0582934	0	0.0134596	0.218712	0.0301967	0.273155	0.012824	0.0825799	0	0.00932699	0	0.0103975	0.01	0.243958	0.995662
TCGA-86-8074-01A	0.0124411	0	0	0.0248631	0	0.136091	0	0.061733	0.0634594	0	0	0.0379965	0.0168799	0.16237	0.0944703	0.232934	0.0614057	0.0325264	0.0423849	0	0	0.0204439	0.023	0.214097	1.00406
TCGA-86-8075-01A	0.0327275	0	0	0.00486466	0	0.0802471	0	0.0735223	0.0489095	0	0.0216189	0	0.0163432	0.196634	0.0161756	0.250322	0.0913639	0.1438	0	0.0156391	0	0.00783306	0.039	0.17768	1.02781
TCGA-86-8076-01A	0.00894617	0.0957745	0	0.134772	0	0.0751417	0	0.13989	0.0521134	0	0.0283906	0	0	0.243252	0.0671465	0.11811	0	0.0237401	0.0127231	0	0	0	0.003	0.308123	0.962078
TCGA-86-8280-01A	0.0371398	0.0116192	0	0.0156467	0	0.16329	0	0.128858	0.0286681	0	0.0180166	0.0008	0.00729467	0.166206	0.11418	0.187606	0.0380178	0.00411625	0.0785519	0	0	0	0.003	0.32416	0.951829
TCGA-86-8358-01A	0.0814919	0	0.0004	0.0638744	0	0.112503	0.00784327	0.0992652	0.0378264	0	0.0323243	0.00329546	0	0.236843	0.0667805	0.241751	0	0	0.0158055	0	0	0	0.036	0.186808	1.02018
TCGA-86-8359-01A	0.0506967	0	0.00646062	0.223849	0	0.128179	0.0159939	0.150874	0.0990046	0	0.0351491	0.00840561	0.00264585	0.157445	0.0383545	0.0419211	0	0	0	0.00569463	0	0.0353273	0.037	0.183428	1.02996
TCGA-86-8585-01A	0.0632349	0.017057	0	0.12383	0	0.0127309	0.00739832	0.111067	0.0715379	0	0.0518915	0	0	0.310704	0.0660726	0.158617	0	0	0.00585903	0	0	0	0.002	0.41102	0.913825
TCGA-86-8668-01A	0.00745776	0.0890797	0	0	0	0.161471	0	0.0854107	0.0590587	0	0.0446191	0	0.0136211	0.142833	0.0640789	0.234797	0.00179246	0	0.0957798	0	0	0	0.039	0.177308	1.01106
TCGA-86-8671-01A	0.0110065	0.0888194	0	0.0933368	0	0.151128	0	0.0570281	0.0441023	0	0.057557	0	0.001	0.213821	0.117209	0.136868	0	0	0.0281588	0	0	0	0.002	0.42335	0.905794
TCGA-86-8672-01A	0.0054517	0	0.00994887	0.123707	0	0.131515	0.0319064	0.108878	0.0843989	0	0.0183381	0.0312253	0	0.143931	0.0549446	0.247659	0.00609792	0	0	0	0	0.00199829	0.007	0.27866	0.976512
TCGA-86-A4JF-01A	0.00610301	0	0.0131927	0	0	0.199155	0	0.113083	0.00655823	0	0.00268427	0.0862636	0.00288967	0.125276	0.0833063	0.245596	0	0.0312895	0.0767838	0	0	0.00781859	0.027	0.201591	1.00771
TCGA-86-A4P7-01A	0.018811	0.0797555	0	0.100442	0	0.110749	0	0.125481	0.0326225	0	0.0221825	0.0117931	0.0103192	0.132806	0.0210024	0.25199	0	0.00111891	0.0809262	0	0	0	0.011	0.240903	0.986469
TCGA-86-A4P8-01A	0.0368565	0	0	0.101647	0	0.212826	0	0.0339834	0.0172878	0	0.041352	0.0113693	0.0263104	0.132958	0.035327	0.287358	0.0004	0	0.0619775	0	0	0.0004	0.003	0.307445	0.960254
TCGA-91-6828-01A	0	0	0.00263135	0.126755	0	0.190859	0	0.0645732	0.0004	0	0	0.0156203	0.067583	0	0.089066	0.351222	0.0455242	0.00145407	0.0443573	0	0	0	0.01	0.247965	0.987601
TCGA-91-6829-01A	0.0928883	0	0.00132953	0.0361369	0	0.0788561	0.0061749	0.0173064	0.0440736	0	0.0306771	0	0	0.253989	0.022518	0.303193	0.00654375	0.0119501	0.09244	0	0	0.00192365	0.044	0.172415	1.03045
TCGA-91-6830-01A	0.0306263	0	0.0004	0.064663	0	0.133705	0	0.0526872	0.0004	0	0.0453735	0.00125379	0	0.179128	0.0772864	0.212196	0	0.105672	0.0675425	0	0	0.0290796	0.038	0.179495	1.02059
TCGA-91-6831-01A	0	0.017654	0.0254172	0.026965	0	0.171363	0	0.0302204	0.0430265	0	0.0461841	0	0.00812062	0.302217	0.10152	0.180993	0	0.00100857	0.029608	0	0	0.0157024	0.007	0.277493	0.983404
TCGA-91-6835-01A	0.0369708	0.0905813	0	0.0493176	0	0.140259	0	0.0699471	0.0482505	0	0.00406907	0	0	0.255959	0.0706478	0.191136	0	0	0.0353603	0	0	0	0.002	0.444772	0.8951
TCGA-91-6840-01A	0.0609384	0	0	0.0649713	0	0.175218	0	0.128798	0.0304604	0	0.0189318	0	0	0.202282	0.120048	0.157487	0	0	0.0408645	0	0	0	0.012	0.233697	0.997511
TCGA-91-6848-01A	0	0.00894733	0	0.0258166	0	0.23038	0.0257434	0.0269161	0	0	0.0768047	0	0.0444951	0.168695	0.146941	0.205589	0	0	0.0377372	0	0	0.00193453	0.007	0.277019	0.979642
TCGA-91-6849-01A	0.00548793	0.0963526	0.0257451	0.0712784	0	0.0701247	0.0169146	0.0235366	0.0114604	0	0.0145808	0	0	0.479969	0	0.119731	0	0.0469617	0.0174983	0	0	0.0004	0.007	0.291446	0.994833
TCGA-91-7771-01A	0.00903045	0.0429186	0	0.0721945	0	0.290316	0.0162099	0.0272661	0.00221826	0	0.0114955	0	0.0156307	0.0663303	0.0696897	0.311778	0	0.0303045	0.0326477	0	0	0.00197015	0.006	0.297368	0.964717
TCGA-91-8496-01A	0.00882226	0	0	0.0781325	0	0.0861073	0	0.0101959	0.0261603	0	0.0192432	0.0288463	0.101977	0.12271	0.0139954	0.294556	0.0497224	0.00215502	0.143468	0	0	0.012647	0.042	0.174335	1.01898
TCGA-91-8497-01A	0.0473037	0.171167	0	0.046031	0	0.0857245	0	0.135594	0.0329585	0	0.0184381	0	0.00556253	0.0595978	0.0205924	0.213138	0.0506161	0.0220395	0.0906786	0	0	0.0006	0.003	0.31328	0.952239
TCGA-91-8499-01A	0	0.00486417	0	0.0336673	0	0.187152	0.0080678	0.102145	0	0	0.0158981	0.00931434	0.0102619	0.149839	0.119051	0.320994	0.0012351	0	0.0375116	0	0	0	0.01	0.250204	0.993276
TCGA-91-A4BC-01A	0.0459589	0	0.0321791	0.382464	0	0.00667091	0.0403778	0.161545	0.0497473	0	0.0209766	0.0040451	0.0016712	0.0383541	0.0514525	0.140043	0	0	0.024515	0	0	0	0.002	0.408688	0.915907
TCGA-91-A4BD-01A	0	0.0160786	0	0.0277705	0	0.114755	0	0.0264772	0.0150004	0	0.0131317	0.0198698	0.240258	0.0167165	0.010318	0.340895	0.00506041	0.0403743	0.113296	0	0	0	0.006	0.293844	0.967332
TCGA-93-7347-01A	0.0262578	0.00294277	0	0.0806269	0	0.12078	0.00761516	0.048059	0.0918133	0	0.0356834	0	0	0.271946	0.0523458	0.199417	0	0.00748538	0.0550281	0	0	0	0.002	0.397751	0.919496
TCGA-93-7348-01A	0.0968213	0	0	0	0	0.186895	0	0.124618	0.0413853	0	0.0483972	0	0	0.304677	0.0427322	0.110342	0	0	0	0.0359969	0	0.00813422	0.049	0.167865	1.03118
TCGA-93-A4JN-01A	0.0792335	0.0968635	0.00764142	0.0189933	0	0.102454	0	0.153193	0.0228985	0	0.0078529	0.00584608	0.0270305	0.121295	0.0324477	0.190721	0	0.0276381	0.105892	0	0	0	0.032	0.191723	1.0018
TCGA-93-A4JO-01A	0.00366958	0.0909045	0	0.0793516	0	0.0875978	0	0.127077	0.0253867	0	0.050469	0	0.010711	0.183769	0.0671337	0.245027	0.0001	0	0.0287653	0	0	0	0.002	0.417659	0.908153
TCGA-93-A4JP-01A	0.0317392	0	0	0	0	0.0334633	0	0.102379	0	0	0	0.0356569	0.00565287	0.149604	0.0717746	0.308641	0	0.122512	0.125302	0	0	0.0132748	0.007	0.268988	0.983444
TCGA-93-A4JQ-01A	0.0153836	0.208271	0	0	0	0.124594	0.00268414	0.152619	0.0289168	0	0.0633049	0	0	0.221205	0.0825481	0.0929448	0	0.00384409	0	0.00368471	0	0	0.002	0.364669	0.9337
TCGA-95-7562-01A	0.0512698	0	0.00123957	0.029588	0	0.0998347	0	0.0758104	0.0511541	0	0.019114	0.00103621	0	0.282322	0.143293	0.198676	0.00505454	0	0.0416078	0	0	0	0.002	0.340932	0.953183
TCGA-95-7567-01A	0	0.037382	0.00320774	0.0923714	0	0.169854	0.0228654	0.0727076	0.0730361	0	0.0624053	0	0.00774148	0.0200365	0.11298	0.28504	0.00832427	0.0241697	0.0078777	0	0	0	0.032	0.192059	1.01466
TCGA-95-7944-01A	0.0558665	0	0.0141286	0.16394	0	0.102046	0.0759493	0.0473931	0.065206	0	0.0965178	0.0489358	0.00864607	0.0911604	0.0816308	0.105018	0	0.00687901	0.0366818	0	0	0	0.003	0.331449	0.952488
TCGA-95-7947-01A	0.110947	0	0	0.105206	0	0.154762	0	0.0969133	0.0184015	0	0.029936	0	0.0002	0.0929107	0.0836287	0.255341	0	0.0151103	0.0329555	0	0	0.00372514	0.017	0.226236	0.994981
TCGA-95-8039-01A	0.00155542	0.0483579	0	0.0186951	0	0.22477	0	0.0350073	0.0381874	0	0.0239767	0.0233447	0.0308318	0	0.0508139	0.251625	0.0829947	0.0816435	0.0864456	0	0	0.00175021	0.01	0.251343	0.978638
TCGA-95-A4VN-01A	0.0042144	0.0298316	0	0.0660225	0	0.172736	0.0485375	0.0980285	0	0	0.0540764	0	0.00732132	0.110057	0.0936879	0.278204	0	0.0143549	0.0171454	0	0	0.00578265	0.002	0.357918	0.936831
TCGA-95-A4VP-01A	0.102158	0.0448536	0	0.125665	0	0.199415	0	0.157537	0.00491074	0	0.0312991	0	0.00623151	0.0578717	0.0658209	0.185482	0	0.00951936	0.00923665	0	0	0	0.036	0.184828	1.0171
TCGA-97-7552-01A	0	0.218947	0	0.141291	0	0.129394	0	0.0636015	0.0423616	0	0.0386579	0.00890227	0.0114826	0.109531	0.0819304	0.114728	0	0.00207224	0.0371013	0	0	0	0.003	0.318047	0.953892
TCGA-97-7553-01A	0.0251627	0.0296617	0	0.0348439	0	0.162816	0	0.0303741	0	0	0.0453451	0	0.0183918	0.240877	0.0494343	0.228164	0.0303288	0	0.0673893	0	0	0.037211	0.003	0.314575	0.959462
TCGA-97-7554-01A	0.0271835	0.0107291	0.0409696	0.0173486	0	0.204705	0	0.057839	0.0150944	0	0.0401835	0	0	0.135404	0.0691681	0.338495	0	0	0.0357725	0	0	0.00710693	0.043	0.173131	1.02061
TCGA-97-7941-01A	0.105799	0	0	0.0400796	0	0.147061	0	0.103454	0.0414044	0	0.0433558	0	0.0100972	0.048925	0.0610862	0.292459	0.0145823	0.0009	0.0908083	0	0	0	0.025	0.205532	0.998512
TCGA-97-8172-01A	0	0.254303	0	0.0385224	0	0.159596	0	0.0966497	0.00265916	0	0.00731185	0	0.00188415	0.0558636	0.0329942	0.224961	0	0.0101892	0.115066	0	0	0	0.002	0.355933	0.935157
TCGA-97-8174-01A	0.0555377	0	0	0.0433771	0	0.245674	0.00694007	0.0466518	0.0136813	0	0.0378136	0	0.0448184	0	0.0771303	0.33276	0	0.0264319	0.0691838	0	0	0	0.01	0.245528	0.984713
TCGA-97-8175-01A	0.00315317	0	0	0	0	0.099337	0	0.0970445	0.0804805	0	0.035545	0	0.0509376	0.193176	0.00449219	0.16353	0.158674	0.0425553	0.0625407	0	0	0.00817416	0.01	0.245152	0.987093
TCGA-97-8176-01A	0.0328955	0	0	0	0	0.0837387	0	0.0898337	0.00756316	0	0.0384474	0.0202534	0.0558305	0.120221	0.00625683	0.324147	0	0.0193997	0.163163	0	0	0.0382499	0.047	0.170741	1.02042
TCGA-97-8177-01A	0.00650212	0.041468	0	0.0708518	0	0.0360066	0	0.068498	0.0571096	0	0.0397997	0.00254091	0.0392864	0.0863056	0.0231117	0.299295	0.0889288	0.0164617	0.121746	0	0	0.00208814	0.007	0.276138	0.969949
TCGA-97-8547-01A	0.0004	0	0.0016753	0	0	0.121177	0	0.0458865	0.0536747	0	0.0289041	0	0	0.512442	0	0.107969	0	0.0847312	0.0430928	0	0	0	0.002	0.365702	0.959007
TCGA-97-8552-01A	0	0.115306	0	0.0401921	0	0.108575	0	0.0894889	0.0003	0	0.0189797	0.012307	0.0670645	0.0602655	0.0255565	0.262583	0.0799937	0.027974	0.0913166	0	0	0.0001	0.01	0.248886	0.978269
TCGA-97-A4LX-01A	0.0645975	0.00752087	0	0.10067	0	0.0909764	0	0.0738649	0.0681963	0	0.070974	0	0.00894644	0.0585795	0.120091	0.231331	0.0157443	0.0253517	0.0613348	0	0	0.0018208	0.002	0.362363	0.933932
TCGA-97-A4M1-01A	0.0353437	0	0	0.0581906	0	0.075723	0	0.0745041	0	0	0.00454656	0.0368483	0.0721792	0.145634	0.00967488	0.226872	0.0205923	0.0168201	0.223072	0	0	0	0.032	0.193023	1.00896
TCGA-97-A4M2-01A	0.0372192	0	0	0.0821742	0	0.12857	0	0.0778473	0.0332132	0	0.0609184	0.0001	0.0396988	0.181041	0.0323845	0.209151	0.0116991	0.0213742	0.0810798	0	0	0.00350263	0.003	0.316386	0.954227
TCGA-97-A4M5-01A	0.0229491	0.0249836	0	0.0351136	0	0.130274	0	0.0704295	0.0076081	0	0.0564239	0.0133448	0.0217708	0.115889	0.038848	0.283307	0	0.0193852	0.144891	0	0	0.0147827	0.01	0.258928	0.97813
TCGA-97-A4M6-01A	0.0687295	0.0263946	0	0.0363216	0	0.16202	0.0007	0.0962411	0.0152561	0	0.0470489	0	0.0299047	0.127569	0.136462	0.127789	0.0381111	0.0269429	0.058744	0	0	0.00178093	0.011	0.239823	0.989021
TCGA-97-A4M7-01A	0.0113168	0.0542364	0	0.043453	0	0.176024	0	0.0995133	0.0633739	0	0	0.0236105	0.0563226	0.00528132	0.0489306	0.191382	0.0588138	0.0590643	0.104465	0	0	0.00421285	0.017	0.227367	0.986571
TCGA-99-7458-01A	0.00144137	0.00382562	0	0.0248926	0	0.239033	0	0.0728803	0.0701957	0	0.0115577	0.033354	0.0237984	0.143916	0.0379512	0.224407	0.0281455	0.0408046	0.043797	0	0	0	0.011	0.235635	0.991638
TCGA-99-8025-01A	0.0449524	0.0223802	0.00895567	0	0	0.10814	0	0.066357	0.0579715	0	0.0604027	0	0	0.309234	0.0603578	0.242249	0	0.00154918	0.0174511	0	0	0	0.037	0.183181	1.03078
TCGA-99-8028-01A	0.00582877	0.0330668	0	0.119614	0	0.123036	0.00977832	0.0846958	0.0807825	0	0.028537	0	0	0.202489	0.0912607	0.195968	0.00183746	0	0.0231057	0	0	0	0.002	0.4482	0.893213
TCGA-99-8033-01A	0.00725232	0	0	0.168158	0	0	0.0520055	0.136624	0.0292525	0	0.120014	0.0404137	0.019372	0.0766577	0.0451963	0.107932	0	0.150374	0.0288161	0	0	0.0179305	0.025	0.2069	1.01381
TCGA-99-AA5R-01A	0.0470882	0.128475	0	0.150907	0	0.0677846	0	0.121699	0.00600353	0	0.0305827	0.0165168	0.0361428	0.139995	0.0547114	0.162286	0	0	0.0378072	0	0	0	0.007	0.292313	0.964095
TCGA-J2-8192-01A	0.0202844	0.00973028	0	0.013897	0	0.231357	0	0.0125049	0	0	0.0380533	0	0.0242454	0.152883	0.0179144	0.298468	0.0379596	0.0578739	0.0591415	0	0	0.0256874	0.003	0.313565	0.957975
TCGA-L4-A4E6-01A	0.0339886	0	0	0.0210864	0	0.108338	0	0.0266434	0	0	0.0370269	0	0.00673229	0.208189	0.0153731	0.441468	0.0076859	0.015811	0.0764961	0	0	0.00116035	0.003	0.330915	0.961464
TCGA-L9-A444-01A	0.00294242	0.0278828	0	0.130605	0	0.246312	0.0412184	0.0582032	0.061127	0	0.107588	0	0.0162885	0.0564327	0.118897	0.107409	0	0	0.0250929	0	0	0	0.003	0.325909	0.958292
TCGA-L9-A743-01A	0.0244098	0.0759461	0	0	0	0.187149	0.00492481	0.0955415	0.00991897	0	0.0587017	0	0	0.109595	0.034941	0.238266	0.0168547	0.115473	0.0259149	0	0	0.00236351	0.003	0.329821	0.947603
TCGA-L9-A8F4-01A	0.0505806	0.0243049	0.0049371	0.153037	0	0.0460013	0.00781655	0.170897	0.072504	0	0	0	0	0.207579	0.069126	0.183419	0	0	0.00979676	0	0	0	0.003	0.31778	0.957718
TCGA-MN-A4N4-01A	0.0314498	0	0	0.0497447	0	0	0	0.0592615	0.0785852	0	0.0252019	0	0	0.596675	0.00957114	0.117683	0	0	0.0254454	0	0	0.00638215	0.001	0.487094	0.889411
TCGA-MP-A4SV-01A	0.0179045	0.00545114	0	0.0726084	0	0.243116	0	0.106456	0.052023	0	0.0457586	0.00761431	0.0382436	0.0988897	0.0845257	0.17534	0.00468093	0.0365751	0.0108134	0	0	0	0.037	0.180714	1.01902
TCGA-MP-A4SW-01A	0.00904802	0.109876	0	0.0208242	0	0.181119	0	0.0798494	0.0421126	0	0.0521567	0	0.0250366	0.167622	0.0327323	0.20715	0	0.0182356	0.0542383	0	0	0	0.048	0.17005	1.01505
TCGA-MP-A4SY-01A	0.0419914	0	0.0007	0	0	0.0900086	0	0.0155262	0.0231182	0	0.00478991	0.00742648	0	0.396082	0.0392418	0.219359	0.0991931	0	0.0624226	0	0	0.0001	0.006	0.294069	0.992242
TCGA-MP-A4T4-01A	0	0.0252388	0.00361953	0.163239	0	0.096961	0.0187183	0.0873702	0.0594079	0	0.0677478	0	0.013548	0.117229	0.119749	0.184532	0	0.0134209	0.0292191	0	0	0	0.003	0.318563	0.957385
TCGA-MP-A4T7-01A	0.0297083	0.0002	0	0.0424123	0	0.154664	0	0.092959	0.028238	0	0.0362643	0.0116474	0.0151543	0.114225	0.0377293	0.226723	0	0.163982	0.0377484	0	0	0.00835632	0.037	0.183762	1.01519
TCGA-MP-A4T9-01A	0.06764	0	0	0.055101	0	0.0501983	0	0.0696518	0.0388413	0	0.0468176	0	0.0224666	0.199585	0.0350735	0.270155	0.00993523	0.0287954	0.102033	0	0	0.00370651	0.008	0.265028	0.979195
TCGA-MP-A4TC-01A	0.0134594	0	0	0.0546781	0	0.118082	0.0126184	0.0542069	0.0389127	0	0.0589313	0	0	0.291137	0.112727	0.220644	0	0	0.0246031	0	0	0	0.002	0.377216	0.934098
TCGA-MP-A4TD-01A	0.101968	0.05946	0	0.0508814	0	0.0905972	0	0.139642	0.0281641	0	0.00810117	0.00650127	0	0.337176	0.00296673	0.137488	0	0.0154347	0.0216195	0	0	0	0.01	0.257114	0.992572
TCGA-MP-A4TH-01A	0.0155981	0.267632	0	0.0961165	0	0.130526	0	0.125526	0.0348549	0	0.0250097	0	0.001	0.0483894	0.0333973	0.178861	0.00778255	0.0206428	0.0147102	0	0	0	0.008	0.267147	0.976725
TCGA-MP-A4TI-01A	0.0216067	0.00468673	0	0.00786148	0	0.144233	0	0.0785708	0.0723609	0	0.0174803	0.0204639	0	0.232933	0.0889165	0.234364	0	0.0429607	0.0334059	0	0	0.0002	0	0.600381	0.808864
TCGA-MP-A4TJ-01A	0.00302152	0.0933942	0	0.0620953	0	0.184603	0.0647457	0.107859	0.0279368	0	0.0904862	0	0.00190151	0.115629	0.0892841	0.138089	0	0.00544051	0.0125739	0	0	0.00294012	0.002	0.383565	0.924224
TCGA-MP-A4TK-01A	0.00164929	0.0708856	0	0.0227639	0	0.0386273	0	0.0913223	0.0245217	0	0.0353511	0	0	0.396313	0.0583265	0.231421	0.0020302	0	0.0266893	0	0	0.0001	0.002	0.471657	0.884552
TCGA-NJ-A4YF-01A	0.0421511	0	0.002622	0.0452507	0	0.0607269	0	0.126836	0.0661101	0	0.041819	0	0	0.413141	0.0287762	0.159533	0	0	0	0.0121904	0	0.0008	0.01	0.251276	1.0092
TCGA-NJ-A4YG-01A	0	0.0255329	0	0.0481585	0	0.167511	0	0.063431	0.0396976	0	0	0.0195425	0.0386998	0.114628	0.0278792	0.221899	0.0974717	0.055429	0.0714842	0	0	0.00863582	0.021	0.222156	0.992644
TCGA-NJ-A4YP-01A	0	0.0199162	0	0.0615197	0	0.0990723	0	0.0836422	0.0507424	0	0.0728698	0	0	0.202268	0.0419608	0.23358	0	0.100277	0.0311057	0	0	0.00304632	0.023	0.214868	1.00563
TCGA-NJ-A4YQ-01A	0.0362846	0.0691984	0	0.0872963	0	0.119532	0	0.0880872	0.0632664	0	0.0496533	0	0	0.247024	0.0702531	0.153609	0	0	0.0157953	0	0	0	0.001	0.512562	0.859774
TCGA-NJ-A55A-01A	0	0.262536	0	0.0851712	0	0.127975	0	0.133943	0	0	0	0.001	0.0113463	0.00729098	0.0562918	0.156808	0.00831409	0.0296626	0.119663	0	0	0	0.013	0.232536	0.987418
TCGA-NJ-A55O-01A	0.0088958	0.0286565	0	0	0	0.19264	0	0.0505451	0.0546197	0	0.0257856	0.00851266	0.0107128	0.134099	0.0395082	0.400185	0	0.0108125	0.035027	0	0	0	0.01	0.24658	0.993223
TCGA-NJ-A55R-01A	0.0959928	0.124379	0.0536022	0	0	0.0430719	0	0.137553	0.0158742	0	0.0201239	0	0	0.384123	0.0091369	0.0696133	0	0	0.0465292	0	0	0	0.042	0.174456	1.03289
TCGA-S2-AA1A-01A	0.0557912	0.135966	0.00458332	0.0669391	0	0.269351	0.0114681	0.0576251	0.0274475	0	0.0229451	0	0.0149488	0.12213	0.0444222	0.0913136	0.0170481	0.0104203	0.0476016	0	0	0	0.003	0.328389	0.948514
