# Supplementary figures and images for: The miR-582/CD1B Axis Is Involved in Regulation of Dendritic Cells and Is Associated with Clinical Outcomes in Advanced Lung Adenocarcinoma
Source: Hindawi journal article supplement (doi:10.1155/2020/4360930), 2020-01-01

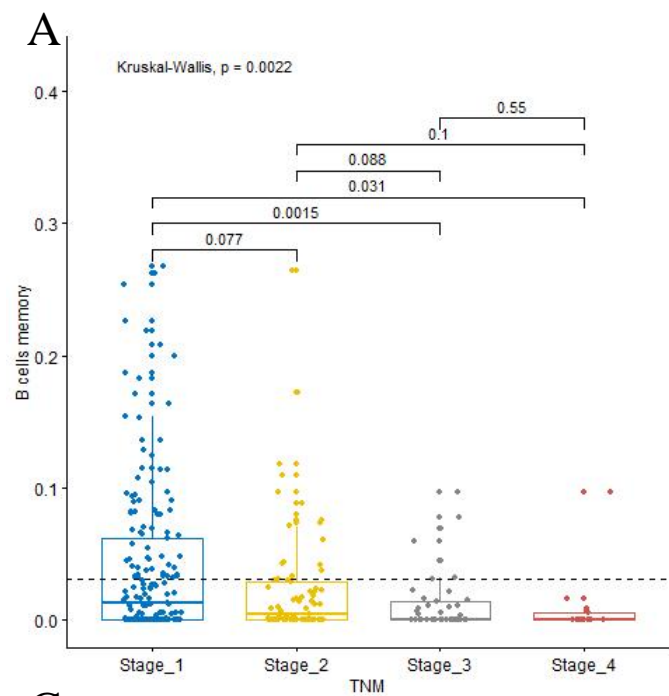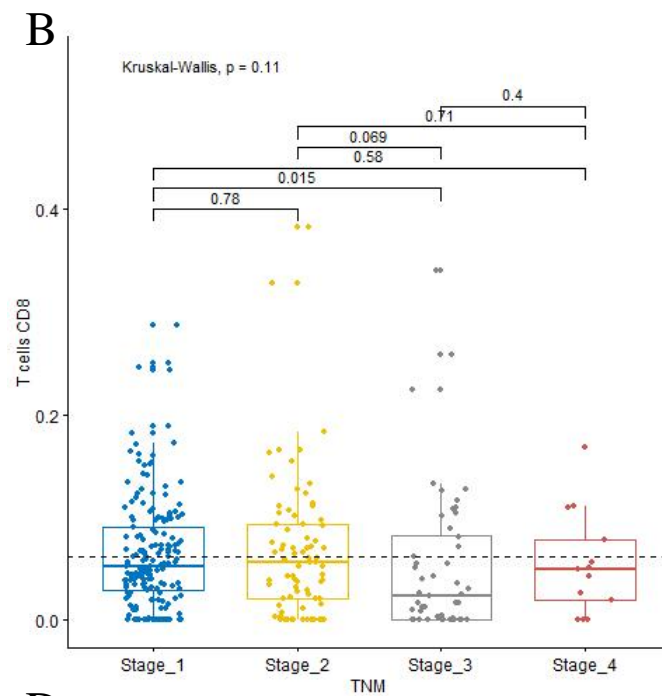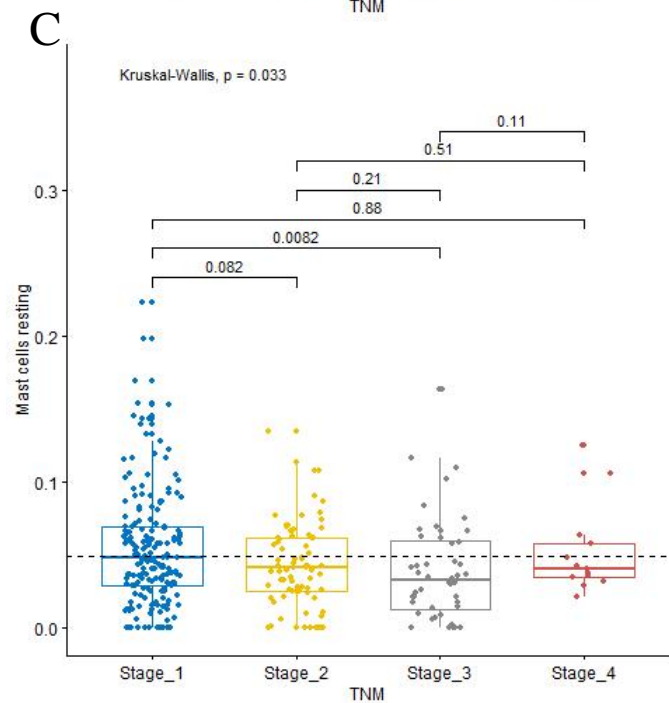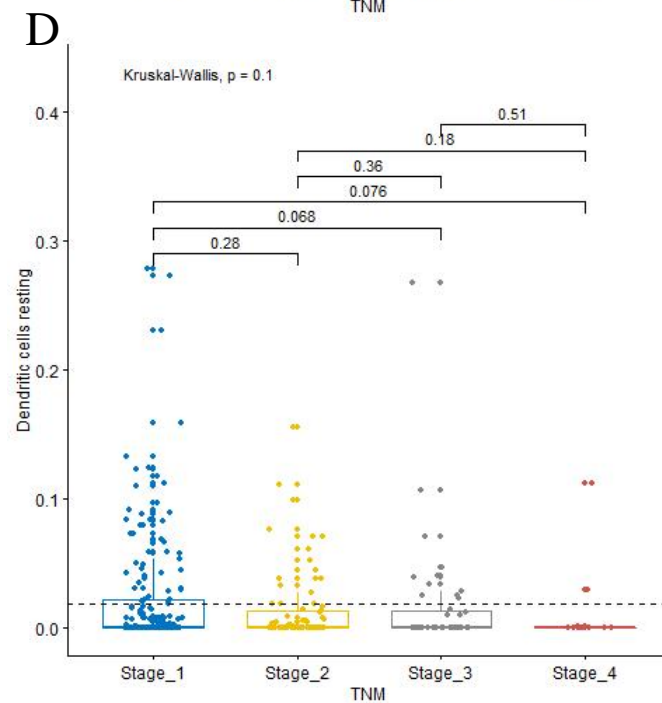

Supplement: f1 [file 4360930.f1.zip]
